# Supplementary material for: A novel gene REPTOR2 activates the autophagic degradation of wing disc in pea aphid
Source: eLife. 2023 Mar 21;12:e83023. doi: 10.7554/eLife.83023 (PMC10030113; doi:10.7554/eLife.83023)
Supplement: Figure 1—figure supplement 1—source data 1. [file elife-83023-fig1-figsupp1-data1.xlsx]

## Sheet: Sheet1
Figure 1-figure supplement 1-Source Data 1
Figure 1-figure supplement 1: The percentage of winged offspring produced by two-adult contacting treatment for 4 h of different pea aphid strains
Strain	Replicate	Winged %
Ningxia Red	1	87.5
	2	100
	3	100
	4	83.3333
	5	87.5
	6	100
	7	88.8889
	8	0
	9	100
	10	55.5556
	11	100
	12	50
	13	75
	14	25
	15	87.5
	16	83.3333
	17	75
	18	100
	19	75
	20	85.7143
	21	100
	22	100
	23	100
	24	80
	25	100
	26	83.3333
	27	100
	28	100
	29	100
	30	50
	31	100
	32	66.6667
	33	100
	34	71.4286
	35	100
	36	100
	37	50
	38	100
	39	100
	40	100
Ningxia Green	1	0
	2	0
	3	33.3333
	4	71.4286
	5	0
	6	80
	7	12.5
	8	66.6667
	9	25
	10	50
	11	66.6667
	12	62.5
	13	0
	14	70
	15	40
	16	33.3333
	17	25
	18	87.5
	19	18.1818
	20	25
	21	12.5
	22	20
	23	66.6667
	24	10
	25	20
	26	0
	27	40
	28	0
	29	50
	30	75
	31	20
	32	91.6667
	33	50
	34	62.5
	35	57.1429
	36	77.7778
	37	0
	38	87.5
	39	80
	40	80
Gansu Red	1	0
	2	100
	3	90.9091
	4	0
	5	62.5
	6	71.4286
	7	40
	8	0
	9	0
	10	50
	11	0
	12	14.2857
	13	85.7143
	14	50
	15	100
	16	63.6364
	17	44.4444
	18	57.1429
	19	88.8889
	20	83.3333
	21	88.8889
	22	100
	23	14.2857
	24	100
	25	87.5
	26	87.5
	27	0
	28	14.2857
	29	90
	30	66.6667
	31	91.6667
	32	80
	33	90.9091
	34	88.8889
	35	71.4286
	36	75
	37	0
	38	60
	39	50
	40	42.8571
Gansu Green	1	77.7778
	2	80
	3	66.6667
	4	66.6667
	5	55.5556
	6	75
	7	0
	8	25
	9	18.1818
	10	100
	11	66.6667
	12	27.2727
	13	0
	14	20
	15	80
	16	16.6667
	17	50
	18	83.3333
	19	0
	20	66.6667
	21	85.7143
	22	20
	23	90.9091
	24	88.8889
	25	50
	26	66.6667
	27	100
	28	37.5
	29	20
	30	75
	31	0
	32	0
	33	100
	34	0
	35	100
	36	87.5
	37	16.6667
	38	0
	39	60
	40	60
