# Supplementary material for: A novel gene REPTOR2 activates the autophagic degradation of wing disc in pea aphid
Source: eLife. 2023 Mar 21;12:e83023. doi: 10.7554/eLife.83023 (PMC10030113; doi:10.7554/eLife.83023)
Supplement: Figure 1—source data 1. [file elife-83023-fig1-data1.xlsx]

## Sheet: Sheet1
Figure 1 - Source Data 1
Figure 1A: Two female adults in a petri dish can efficiently induce a high proportion of winged offspring
Density	Replicate	Winged%
1	1	0
	2	0
	3	0
	4	0
	5	0
	6	10
	7	0
	8	0
	9	0
	10	0
	11	0
	12	4.7619
	13	0
	14	0
	15	0
2	1	88.8889
	2	95.2381
	3	84.2105
	4	82.6087
	5	95
	6	100
	7	90
	8	65
	9	70
	10	78.9474
	11	68.4211
	12	73.3333
	13	95
	14	85
	15	95
4	1	95
	2	100
	3	84.2105
	4	100
	5	100
	6	90
	7	90
	8	94.7368
	9	84.6154
	10	88.2353
	11	95
	12	82.6087
	13	95.8333
	14	89.4737
	15	84.6154
8	1	30
	2	72.2222
	3	85
	4	100
	5	85
	6	76.1905
	7	90
	8	94.1176
	9	90
	10	94.1176
	11	90
	12	94.4444
	13	95.2381
	14	100
	15	95
