# Supplementary material for: A novel gene REPTOR2 activates the autophagic degradation of wing disc in pea aphid
Source: eLife. 2023 Mar 21;12:e83023. doi: 10.7554/eLife.83023 (PMC10030113; doi:10.7554/eLife.83023)
Supplement: Figure 1—source data 2. [file elife-83023-fig1-data2.xlsx]

## Sheet: Sheet1
Figure 1 - Source Data 2
Figure 1B: Percentage of winged offspring produced by the two-adult contacting treatment for different durations
Duration	Replicate	Winged %
CR-2h	1	0
	2	100
	3	0
	4	75
	5	66.6667
	6	50
	7	100
	8	100
	9	100
	10	0
	11	0
	12	0
	13	0
	14	60
	15	0
	16	100
	17	0
	18	100
	19	75
CR-4h	1	80
	2	100
	3	85.7143
	4	100
	5	100
	6	100
	7	100
	8	80
	9	100
	10	100
	11	100
	12	66.6667
	13	83.3333
	14	100
	15	100
	16	100
	17	100
	18	88.8889
	19	100
	20	100
CR-8h	1	100
	2	100
	3	100
	4	100
	5	100
	6	71.4286
	7	100
	8	100
	9	71.4286
	10	83.3333
	11	100
	12	100
	13	100
	14	71.4286
	15	100
	16	66.6667
	17	87.5
	18	100
