# Supplementary material for: A novel gene REPTOR2 activates the autophagic degradation of wing disc in pea aphid
Source: eLife. 2023 Mar 21;12:e83023. doi: 10.7554/eLife.83023 (PMC10030113; doi:10.7554/eLife.83023)
Supplement: Figure 1—source data 3. [file elife-83023-fig1-data3.xlsx]

## Sheet: Sheet1
Figure 1 - Source Data 3
Figure 1C: Daily percentage of winged offspring for the two-adult contacting treatment for 4 h
	Replicate	Winged %
1st day	1	87.5
	2	91.6667
	3	72.7273
	4	70
	5	85.7143
	6	100
	7	100
	8	100
	9	100
	10	100
	11	92.3077
	12	100
	13	100
	14	100
	15	100
	16	100
	17	100
	18	100
2nd day	1	77.7778
	2	60
	3	100
	4	100
	5	100
	6	100
	7	70
	8	66.6667
	9	100
	10	100
	11	100
	12	100
	13	100
	14	100
	15	100
	16	100
	17	100
3rd day	1	85.7143
	2	70
	3	100
	4	37.5
	5	80
	6	100
	7	42.8571
	8	77.7778
	9	16.6667
	10	100
	11	100
	12	100
	13	100
	14	91.6667
	15	100
	16	80
	17	100
	18	75
4th day	1	100
	2	9.09091
	3	85.7143
	4	37.5
	5	100
	6	90
	7	0
	8	100
	9	0
	10	90
	11	90
	12	18.1818
	13	33.3333
	14	75
	15	100
	16	0
	17	50
	18	0
5th day	1	100
	2	0
	3	91.6667
	4	0
	5	100
	6	100
	7	0
	8	33.3333
	9	0
	10	100
	11	100
	12	71.4286
	13	100
	14	70
	15	90.9091
	16	0
	17	40
