# Supplementary material for: A novel gene REPTOR2 activates the autophagic degradation of wing disc in pea aphid
Source: eLife. 2023 Mar 21;12:e83023. doi: 10.7554/eLife.83023 (PMC10030113; doi:10.7554/eLife.83023)
Supplement: Figure 1—source data 4. [file elife-83023-fig1-data4.xlsx]

## Sheet: Sheet1
Figure 1 - Source Data 4
Figure 1F: The relative area of the wing disc measured by imageJ
	Replicate	Relative area of wing disc
WD-24h	1	0.00941953
	2	0.00885597
	3	0.0108462
	4	0.0108462
	5	0.00676626
	6	0.0056239
	7	0.011396
	8	0.00962501
	9	0.011997
	10	0.00759301
	11	0.0118264
	12	0.0091655
	13	0.00952021
	14	0.00800907
	15	0.00599803
	16	0.0062258
	17	0.00960025
	18	0.00779037
	19	0.00903247
	20	0.00732362
WD-30h	1	0.00565155
	2	0.00837989
	3	0.00958933
	4	0.00618442
	5	0.0084803
	6	0.00705441
	7	0.00732601
	8	0.00815314
	9	0.00867113
	10	0.00895312
	11	0.0100414
	12	0.00980236
	13	0.00952998
	14	0.00680713
	15	0.00995768
	16	0.00697038
	17	0.0101249
	18	0.00804315
	19	0.00817061
	20	0.00969395
WD-36h	1	0.0110356
	2	0.0085251
	3	0.0130142
	4	0.0114321
	5	0.0145107
	6	0.00941649
	7	0.010989
	8	0.0118815
	9	0.0134359
	10	0.00959011
	11	0.00924409
	12	0.00830798
	13	0.00982526
	14	0.0105313
	15	0.0115414
	16	0.0159561
	17	0.0124292
	18	0.0111574
	19	0.00985069
	20	0.0102224
WLD-24h	1	0.00839496
	2	0.00912786
	3	0.00689546
	4	0.00998653
	5	0.00685558
	6	0.0105119
	7	0.0105797
	8	0.00934783
	9	0.0089448
	10	0.00836303
	11	0.00897931
	12	0.00876885
	13	0.00451249
	14	0.00781628
	15	0.00872632
	16	0.00782978
	17	0.0102856
	18	0.00824123
	19	0.00869832
	20	0.00820827
WLD-30h	1	0.00524511
	2	0.00625378
	3	0.00510204
	4	0.00608051
	5	0.00724133
	6	0.00508286
	7	0.00636482
	8	0.00694344
	9	0.00674923
	10	0.00528806
	11	0.004768
	12	0.00725875
	13	0.00739019
	14	0.00747322
	15	0.00857719
	16	0.0056941
	17	0.00881316
	18	0.00705053
	19	0.0074282
	20	0.00584898
WLD-36h	1	0.00372793
	2	0.00478301
	3	0.00346046
	4	0.00375497
	5	0.0047781
	6	0.00364431
	7	0.00361972
	8	0.00300505
	9	0.00431417
	10	0.00285497
	11	0.00141899
	12	0.00451496
	13	0.00479172
	14	0.00313059
	15	0.00601755
	16	0.00406003
	17	0.0041204
	18	0.00342203
	19	0.00396736
	20	0.00359308
