# Supplementary material for: A novel gene REPTOR2 activates the autophagic degradation of wing disc in pea aphid
Source: eLife. 2023 Mar 21;12:e83023. doi: 10.7554/eLife.83023 (PMC10030113; doi:10.7554/eLife.83023)
Supplement: Figure 2—source data 1. [file elife-83023-fig2-data1.xlsx]

## Sheet: Sheet1
Figure 2 - Source Data 1
Figure 2A: TEM images of wing discs of winged- and wingless-destined aphids at 30 h post birth
Morph	Replicate	Total cells	Autophagic cells	Autophagic cells%
WD	1	24	3	12.5
	2	30	4	13.3
	3	39	7	17.9
WLD	1	23	12	52.2
	2	17	10	58.8
	3	25	13	52
Morph	Replicate	Number of autophagosome
WD	1	0
	2	0
	3	0
WLD	1	4
	2	3
	3	5
