# Supplementary material for: A novel gene REPTOR2 activates the autophagic degradation of wing disc in pea aphid
Source: eLife. 2023 Mar 21;12:e83023. doi: 10.7554/eLife.83023 (PMC10030113; doi:10.7554/eLife.83023)
Supplement: Figure 2—source data 2. [file elife-83023-fig2-data2.xlsx]

## Sheet: Sheet1
Figure 2 - Source Data 2
Figure 2B: Autophagy in the wing disc was indicated by the hallmark ATG8 (red) in immunofluorescence
Morph	Replicate	ATG8/DAPI
WD	1	1.15223
	2	1.00552
	3	1.09387
	4	1.08369
	5	0.842307
	6	1.06105
	7	0.761343
WLD	1	3.56906
	2	2.18568
	3	1.85769
	4	1.52686
	5	1.41064
	6	1.76609
	7	3.14445
