# Supplementary material for: A novel gene REPTOR2 activates the autophagic degradation of wing disc in pea aphid
Source: eLife. 2023 Mar 21;12:e83023. doi: 10.7554/eLife.83023 (PMC10030113; doi:10.7554/eLife.83023)
Supplement: Figure 2—source data 3. [file elife-83023-fig2-data3.xlsx]

## Sheet: Sheet1
Figure 2 - Source Data 3
Figure 2C: Apoptosis was determined by TUNEL assays
Morph	Replicate	TUNEL/DAPI
WD	1	0.797052
	2	1.36577
	3	0.989444
	4	0.828221
	5	1.01952
WLD	1	0.824789
	2	1.20732
	3	0.502848
	4	0.553238
	5	0.606326
