# Supplementary material for: A novel gene REPTOR2 activates the autophagic degradation of wing disc in pea aphid
Source: eLife. 2023 Mar 21;12:e83023. doi: 10.7554/eLife.83023 (PMC10030113; doi:10.7554/eLife.83023)
Supplement: Figure 2—source data 4. [file elife-83023-fig2-data4.xlsx]

## Sheet: Sheet1
Figure 2 - Source Data 4
Figure 2D: Autophagy-related genes were determined by qPCR
Morph	Replicate	ATG1a
WD	1	0.812485
	2	1.09847
	3	1.0628
	4	1.02624
WLD	1	1.64366
	2	1.18987
	3	1.43904
	4	1.12507
Morph	Replicate	ATG1b
WD	1	1.08432
	2	0.968328
	3	0.964674
	4	0.982681
WLD	1	1.22972
	2	1.22202
	3	1.30528
	4	1.08467
Morph	Replicate	ATG3a
WD	1	0.950438
	2	0.967497
	3	1.11896
	4	0.963104
WLD	1	1.83489
	2	2.71926
	3	1.61461
	4	1.54882
Morph	Replicate	ATG3b
WD	1	0.555898
	2	1.32412
	3	1.14662
	4	0.97337
WLD	1	1.6661
	2	1.15679
	3	1.82557
	4	1.70838
Morph	Replicate	ATG4
WD	1	0.949148
	2	1.01187
	3	1.03714
	4	1.00185
WLD	1	1.53589
	2	2.02392
	3	1.4952
	4	1.42776
Morph	Replicate	ATG5
WD	1	0.977143
	2	0.987245
	3	1.06004
	4	0.975576
WLD	1	0.864751
	2	0.818035
	3	0.94422
	4	0.994322
Morph	Replicate	ATG7
WD	1	0.959483
	2	1.0428
	3	1.1054
	4	0.892314
WLD	1	1.26168
	2	1.46099
	3	1.1119
	4	0.908166
Morph	Replicate	ATG8
WD	1	0.555114
	2	1.82032
	3	0.146015
	4	1.47856
WLD	1	0.417792
	2	0.339352
	3	0.548738
	4	1.47514
Morph	Replicate	ATG10
WD	1	0.929661
	2	0.944299
	3	1.16809
	4	0.957951
WLD	1	1.09674
	2	1.47488
	3	1.20251
	4	1.32092
Morph	Replicate	ATG12
WD	1	0.990026
	2	0.922757
	3	1.1088
	4	0.978417
WLD	1	0.987811
	2	1.50775
	3	0.99833
	4	1.02999
Morph	Replicate	ATG13
WD	1	1.02664
	2	0.885602
	3	1.15479
	4	0.932968
WLD	1	1.19441
	2	1.20431
	3	1.21156
	4	1.45316
Morph	Replicate	ATG14
WD	1	1.0968
	2	1.0087
	3	0.989263
	4	0.905237
WLD	1	1.34308
	2	1.30744
	3	1.21347
	4	1.00771
Morph	Replicate	ATG16
WD	1	1.09248
	2	0.892002
	3	1.14444
	4	0.871083
WLD	1	1.33867
	2	0.93308
	3	0.965391
	4	0.698291
