# Supplementary material for: A novel gene REPTOR2 activates the autophagic degradation of wing disc in pea aphid
Source: eLife. 2023 Mar 21;12:e83023. doi: 10.7554/eLife.83023 (PMC10030113; doi:10.7554/eLife.83023)
Supplement: Figure 2—source data 5. [file elife-83023-fig2-data5.xlsx]

## Sheet: Sheet1
Figure 2 - Source Data 5
Figure 2E: Pro-apoptotic genes, anti-apoptotic genes were determined by qPCR
Morph	Replicate	Ark
WD	1	0.632851
	2	1.3604
	3	0.952347
	4	1.0544
WLD	1	1.07875
	2	0.880397
	3	0.943981
	4	0.728261
Morph	Replicate	Dronc1
WD	1	0.776345
	2	1.18815
	3	0.831506
	4	1.204
WLD	1	1.0324
	2	0.654123
	3	0.781515
	4	0.780318
Morph	Replicate	Dronc2
WD	1	1.01047
	2	1.04258
	3	0.987787
	4	0.959169
WLD	1	1.22478
	2	0.740138
	3	0.758741
	4	0.772924
Morph	Replicate	DrICE
WD	1	0.745284
	2	1.3062
	3	0.82348
	4	1.12504
WLD	1	1.08135
	2	0.921896
	3	0.957439
	4	1.02655
Morph	Replicate	Decay1
WD	1	0.620662
	2	1.44934
	3	1.00487
	4	0.925131
WLD	1	0.814525
	2	1.06006
	3	0.99678
	4	1.21759
Morph	Replicate	Decay2
WD	1	0.911227
	2	1.23293
	3	0.997403
	4	0.858439
WLD	1	0.7765
	2	0.789885
	3	0.68533
	4	0.839475
Morph	Replicate	IAP1
WD	1	0.720382
	2	0.968157
	3	1.42232
	4	0.889144
WLD	1	1.00725
	2	0.949435
	3	0.897673
	4	1.43823
Morph	Replicate	IAP2
WD	1	0.853585
	2	1.14365
	3	0.974687
	4	1.02808
WLD	1	0.996621
	2	0.942852
	3	0.767149
	4	0.929531
Morph	Replicate	IAP3
WD	1	0.5963
	2	1.4105
	3	0.979442
	4	1.01376
WLD	1	0.728868
	2	1.35
	3	1.17359
	4	1.18539
Morph	Replicate	IAP4
WD	1	0.617585
	2	1.26982
	3	1.08887
	4	1.02372
WLD	1	0.743197
	2	1.22606
	3	0.968048
	4	1.17424
Morph	Replicate	Deterin1
WD	1	1.20212
	2	1.04911
	3	0.868936
	4	0.879841
WLD	1	1.24025
	2	0.785806
	3	0.695841
	4	0.676422
Morph	Replicate	Deterin2
WD	1	1.24766
	2	0.874992
	3	1.08156
	4	0.795788
WLD	1	0.936601
	2	0.608437
	3	0.595061
	4	0.541505
