# Supplementary material for: A novel gene REPTOR2 activates the autophagic degradation of wing disc in pea aphid
Source: eLife. 2023 Mar 21;12:e83023. doi: 10.7554/eLife.83023 (PMC10030113; doi:10.7554/eLife.83023)
Supplement: Figure 2—source data 6. [file elife-83023-fig2-data6.xlsx]

## Sheet: Sheet1
Figure 2 - Source Data 6
Figure 2F: The effect of autophagy agonist rapamycin on autophagy in the wing disc
Treatment	Replicate	ATG8/DAPI
EtOH	1	0.858523
	2	0.928359
	3	1.06214
	4	1.05595
	5	1.09502
Rapamycin	1	1.5802
	2	1.60341
	3	1.68462
	4	1.33179
	5	1.71416
