# Supplementary material for: A novel gene REPTOR2 activates the autophagic degradation of wing disc in pea aphid
Source: eLife. 2023 Mar 21;12:e83023. doi: 10.7554/eLife.83023 (PMC10030113; doi:10.7554/eLife.83023)
Supplement: Figure 2—source data 7. [file elife-83023-fig2-data7.xlsx]

## Sheet: Sheet1
Figure 2 - Source Data 7
Figure 2G: The effect of autophagy inhibitor 3-MA on autophagy in the wing disc
Treatment	Replicate	ATG8/DAPI
H2O	1	1.38466
	2	1.08436
	3	0.946153
	4	0.852091
	5	0.826007
	6	0.90673
3-MA	1	0.714373
	2	0.633801
	3	0.487622
	4	0.563473
	5	0.380189
