# Supplementary material for: A novel gene REPTOR2 activates the autophagic degradation of wing disc in pea aphid
Source: eLife. 2023 Mar 21;12:e83023. doi: 10.7554/eLife.83023 (PMC10030113; doi:10.7554/eLife.83023)
Supplement: Figure 2—source data 8. [file elife-83023-fig2-data8.xlsx]

## Sheet: Sheet1
Figure 2 - Source Data 8
Figure 2H:The effect of autophagy agonist rapamycin on the proportion of winged aphids
Treatment	Replicate	Winged%
EtOH	1	92.8571
	2	66.6667
	3	70
	4	94.7368
	5	55.5556
	6	66.6667
	7	50
	8	76.4706
	9	38.8889
	10	58.3333
Rapamycin	1	45.4545
	2	45
	3	0
	4	23.8095
	5	44.4444
	6	60
	7	56.25
	8	31.5789
	9	16.6667
