# Supplementary material for: A novel gene REPTOR2 activates the autophagic degradation of wing disc in pea aphid
Source: eLife. 2023 Mar 21;12:e83023. doi: 10.7554/eLife.83023 (PMC10030113; doi:10.7554/eLife.83023)
Supplement: Figure 2—source data 9. [file elife-83023-fig2-data9.xlsx]

## Sheet: Sheet1
Figure 2 - Source Data 9
Figure 2I: The effect of autophagy inhibitor 3-MA on the proportion of winged aphids
Treatment	Replicate	Winged%
H2O	1	55.5556
	2	76.1905
	3	50
	4	63.6364
	5	26.6667
	6	50
	7	50
	8	57.8947
	9	38.4615
	10	77.7778
	11	47.3684
3-MA	1	82.3529
	2	88.2353
	3	58.8235
	4	82.3529
	5	62.5
	6	68.4211
	7	50
	8	52.381
	9	50
	10	75
	11	61.9048
	12	75
