# Supplementary material for: A novel gene REPTOR2 activates the autophagic degradation of wing disc in pea aphid
Source: eLife. 2023 Mar 21;12:e83023. doi: 10.7554/eLife.83023 (PMC10030113; doi:10.7554/eLife.83023)
Supplement: Figure 3—figure supplement 1—source data 1. [file elife-83023-fig3-figsupp1-data1.xlsx]

## Sheet: Sheet1
Figure 3-figure supplement 1 - Source Data 1
Figure 3-figure supplement 1A: Expression levels of REPTOR1 in head, thorax and abdomen of winged- and wingless-destined aphids at 24 h post birth
Morph	Time	Replicate	REPTOR2
WD	12h	1	0.775973
		2	0.321111
		3	0.549207
		4	2.35371
	24h	1	1.45651
		2	2.81398
		3	2.05753
		4	1.49554
	36h	1	3.95646
		2	1.30967
		3	2.5172
		4	1.5563
WLD	12h	1	0.869188
		2	1.00775
		3	0.937104
		4	1.06023
	24h	1	1.2875
		2	2.74384
		3	1.10442
		4	1.16836
	36h	1	0.440636
		2	1.7761
		3	3.32049
		4	1.51789
