# Supplementary material for: A novel gene REPTOR2 activates the autophagic degradation of wing disc in pea aphid
Source: eLife. 2023 Mar 21;12:e83023. doi: 10.7554/eLife.83023 (PMC10030113; doi:10.7554/eLife.83023)
Supplement: Figure 3—figure supplement 1—source data 2. [file elife-83023-fig3-figsupp1-data2.xlsx]

## Sheet: Sheet1
Figure 3-figure supplement 1 - Source Data 2
Figure 3-figure supplement 1B: Knockdown of REPTOR1 decreased the gene expression of REPTOR1
Treatment	Replicate	REPTOR1
dsGFP	1	1.32332
	2	0.853804
	3	1.01307
	4	0.8098
dsREPTOR1	1	0.426509
	2	0.18463
	3	0.432629
	4	0.119292
