# Supplementary material for: A novel gene REPTOR2 activates the autophagic degradation of wing disc in pea aphid
Source: eLife. 2023 Mar 21;12:e83023. doi: 10.7554/eLife.83023 (PMC10030113; doi:10.7554/eLife.83023)
Supplement: Figure 3—figure supplement 1—source data 5. [file elife-83023-fig3-figsupp1-data5.xlsx]

## Sheet: Sheet1
Figure 3-figure supplement 1 - Source Data 5
Figure 3-figure supplement 1E: dsREPTOR1 did not affect the proportion of winged aphids
Treatment	Replicate	Winged%
dsGFP	1	52.9412
	2	81.25
	3	36.8421
	4	66.6667
	5	76.4706
	6	75
	7	33.3333
	8	50
	9	50
	10	53.3333
	11	43.75
dsREPTOR1	1	68.4211
	2	81.25
	3	18.75
	4	41.1765
	5	68.4211
	6	46.6667
	7	40
	8	42.1053
	9	31.5789
	10	31.25
	11	53.3333
