# Supplementary material for: A novel gene REPTOR2 activates the autophagic degradation of wing disc in pea aphid
Source: eLife. 2023 Mar 21;12:e83023. doi: 10.7554/eLife.83023 (PMC10030113; doi:10.7554/eLife.83023)
Supplement: Figure 3—source data 1. [file elife-83023-fig3-data1.xlsx]

## Sheet: Sheet1
Figure 3 - Source Data 1
Figure 3A: The volcano plot of log-transformed FPKM showing the number of differentially expressed genes (DEGs) in wingless- vs. winged-destined aphids at 24 h post birth
Gene_id	FoldChange	log2FoldChange	p-value	q-value	Regulation	description	GO_id	GO_term	pathway	pathway_description
LOC100571676	Inf	Inf	0.0497585	0.435734	Up	Nose resistant to fluoxetine protein 6	GO:0006869,GO:0007275,GO:0008289,GO:0016021,GO:0016747	lipid transport|multicellular organism development|lipid binding|integral component of membrane|transferase activity, transferring acyl groups other than amino-acyl groups
LOC100574413	10.8316	3.43718	0.0264642	0.28942	Up
LOC100167758	7.36974	2.88161	5.61e-16	1.89e-13	Up	Cuticle protein 21	GO:0042302	structural constituent of cuticle
LOC107885817	7.09624	2.82705	0.030898	0.320044	Up
LOC100159939	6.81889	2.76954	6.77e-05	0.00239009	Up	Cuticle protein 6	GO:0042302	structural constituent of cuticle
LOC100164067	6.41122	2.6806	6.78e-05	0.00239009	Up
LOC100570172	5.78132	2.5314	1.39e-05	0.000648424	Up	Cuticle protein 6	GO:0042302	structural constituent of cuticle
LOC100572703	5.73769	2.52047	0.00117237	0.0262808	Up	Low-density lipoprotein receptor	GO:0001540,GO:0002020,GO:0005041,GO:0005509,GO:0005764,GO:0005769,GO:0005770,GO:0005771,GO:0005794,GO:0005901,GO:0005905,GO:0007616,GO:0008203,GO:0009897,GO:0009986,GO:0010628,GO:0010629,GO:0010867,GO:0010899,GO:0010986,GO:0015914,GO:0016021,GO:0016323,GO:0030169,GO:0030229,GO:0030299,GO:0034362,GO:0034383,GO:0034384,GO:0036477,GO:0042159,GO:0042632,GO:0042802,GO:0043235,GO:0045177,GO:0045807,GO:…	amyloid-beta binding|protease binding|low-density lipoprotein particle receptor activity|calcium ion binding|lysosome|early endosome|late endosome|multivesicular body|Golgi apparatus|caveola|clathrin-coated pit|long-term memory|cholesterol metabolic process|external side of plasma membrane|cell surface|positive regulation of gene expression|negative regulation of gene expression|positive regulati…
LOC100570018	5.1001	2.35053	3.83e-07	2.91e-05	Up	Protein takeout	GO:0005576,GO:0005615,GO:0007617,GO:0007622,GO:0007623,GO:0007631,GO:0008049,GO:0008343,GO:0042594,GO:0042595	extracellular region|extracellular space|mating behavior|rhythmic behavior|circadian rhythm|feeding behavior|male courtship behavior|adult feeding behavior|response to starvation|behavioral response to starvation
LOC100166724	4.80789	2.2654	6.16e-05	0.00222232	Up	Plasma kallikrein
LOC115033045	4.31524	2.10944	0.00177905	0.0372181	Up
LOC100159685	4.12275	2.04361	1.5e-06	9.56e-05	Up	Protein takeout	GO:0005576,GO:0005615,GO:0007617,GO:0007622,GO:0007623,GO:0007631,GO:0008049,GO:0008343,GO:0042594,GO:0042595	extracellular region|extracellular space|mating behavior|rhythmic behavior|circadian rhythm|feeding behavior|male courtship behavior|adult feeding behavior|response to starvation|behavioral response to starvation
LOC100575692	4.07963	2.02844	0.000110401	0.00366664	Up
LOC100159075	3.87063	1.95257	4.37e-05	0.00167225	Up
LOC100166807	3.82642	1.936	0.00479814	0.0801395	Up	Nose resistant to fluoxetine protein 6	GO:0006869,GO:0007275,GO:0008289,GO:0016021,GO:0016747	lipid transport|multicellular organism development|lipid binding|integral component of membrane|transferase activity, transferring acyl groups other than amino-acyl groups
LOC100168412	3.57626	1.83845	1.75e-05	0.00078387	Up	Ejaculatory bulb-specific protein 3	GO:0005576,GO:0007552,GO:0009615,GO:0045297	extracellular region|metamorphosis|response to virus|post-mating behavior
LOC100569882	3.4434	1.78384	0.00221614	0.044243	Up	ABC transporter G family member 23	GO:0005524,GO:0016021,GO:0016887	ATP binding|integral component of membrane|ATPase activity
LOC100161568	3.29971	1.72234	5.58e-06	0.000303123	Up
cprr1-11	3.29411	1.71989	2.55e-05	0.00108443	Up	Adult-specific rigid cuticular protein 12.6	GO:0042302	structural constituent of cuticle
LOC100571887	3.21211	1.68352	0.0323318	0.330284	Up	Fatty acid synthase (Fragment)	GO:0004312,GO:0006633,GO:0016491,GO:0016787,GO:0016874	fatty acid synthase activity|fatty acid biosynthetic process|oxidoreductase activity|hydrolase activity|ligase activity
LOC100162544	3.16656	1.66291	1.55e-05	0.000707931	Up	17-beta-hydroxysteroid dehydrogenase 13	GO:0005576,GO:0005811,GO:0005829,GO:0016229,GO:0034389,GO:0046889	extracellular region|lipid droplet|cytosol|steroid dehydrogenase activity|lipid droplet organization|positive regulation of lipid biosynthetic process
LOC100160512	3.11432	1.63892	0.000573569	0.014581	Up	Protein spinster homolog 1	GO:0005743,GO:0006869,GO:0006914,GO:0016021,GO:0055085,GO:0090398,GO:0097352	mitochondrial inner membrane|lipid transport|autophagy|integral component of membrane|transmembrane transport|cellular senescence|autophagosome maturation
LOC100575765	3.05003	1.60882	0.035945	0.350786	Up	Peroxidasin	GO:0004601,GO:0005615,GO:0006979,GO:0020037,GO:0042744,GO:0046872	peroxidase activity|extracellular space|response to oxidative stress|heme binding|hydrogen peroxide catabolic process|metal ion binding
LOC100160576	3.04859	1.60814	1.05e-05	0.000518527	Up
LOC100164773	3.04429	1.6061	0.0200846	0.240648	Up
LOC100160356	3.02655	1.59767	0.00336881	0.0605656	Up	Fatty acyl-CoA reductase wat	GO:0005737,GO:0005777,GO:0006629,GO:0010025,GO:0016021,GO:0016324,GO:0035002,GO:0035149,GO:0035336,GO:0045177,GO:0050062,GO:0055114,GO:0080019	cytoplasm|peroxisome|lipid metabolic process|wax biosynthetic process|integral component of membrane|apical plasma membrane|liquid clearance, open tracheal system|lumen formation, open tracheal system|long-chain fatty-acyl-CoA metabolic process|apical part of cell|long-chain-fatty-acyl-CoA reductase activity|oxidation-reduction process|fatty-acyl-CoA reductase (alcohol-forming) activity	ko04212,ko00073,ko04146	Longevity regulating pathway - worm|Cutin, suberine and wax biosynthesis|Peroxisome
LOC115033509	2.9546	1.56296	0.0255181	0.282502	Up	UDP-glucuronosyltransferase 2B9	GO:0005789,GO:0015020,GO:0016021,GO:0016042,GO:0030573,GO:0031090	endoplasmic reticulum membrane|glucuronosyltransferase activity|integral component of membrane|lipid catabolic process|bile acid catabolic process|organelle membrane	ko00982,ko00980,ko00140,ko00040,ko00830,ko00860,ko00983,ko00053,ko00500	Drug metabolism - cytochrome P450|Metabolism of xenobiotics by cytochrome P450|Steroid hormone biosynthesis|Pentose and glucuronate interconversions|Retinol metabolism|Porphyrin and chlorophyll metabolism|Drug metabolism - other enzymes|Ascorbate and aldarate metabolism|Starch and sucrose metabolism
LOC100158990	2.93447	1.5531	0.0171377	0.215177	Up	Trehalase	GO:0004555,GO:0005991,GO:0016021	alpha,alpha-trehalase activity|trehalose metabolic process|integral component of membrane	ko00500	Starch and sucrose metabolism
LOC100164752	2.93225	1.55201	0.0002028	0.00618004	Up
LOC100570518	2.84037	1.50608	1.3e-07	1.21e-05	Up
LOC100161786	2.74303	1.45577	0.000310266	0.00880348	Up
LOC107883347	2.7239	1.44568	0.00234388	0.0460632	Up
LOC100159715	2.6886	1.42685	0.00099348	0.0231716	Up
LOC100575414	2.66672	1.41507	0.00377187	0.0659004	Up	Arylsulfatase B	GO:0003943,GO:0005764,GO:0009986,GO:0010632,GO:0010976,GO:0046872,GO:0061580	N-acetylgalactosamine-4-sulfatase activity|lysosome|cell surface|regulation of epithelial cell migration|positive regulation of neuron projection development|metal ion binding|colon epithelial cell migration
LOC100164538	2.66319	1.41315	9.06e-06	0.000460039	Up
cp68	2.65128	1.40669	2.01e-08	2.34e-06	Up	Pupal cuticle protein Edg-84A	GO:0008010,GO:0008011,GO:0031012,GO:0040003	structural constituent of chitin-based larval cuticle|structural constituent of pupal chitin-based cuticle|extracellular matrix|chitin-based cuticle development
LOC100162620	2.64873	1.4053	3.24e-08	3.51e-06	Up
LOC100166605	2.62694	1.39339	0.00207945	0.0422754	Up
LOC100168822	2.61466	1.38662	3.64e-05	0.00143323	Up	Cuticle protein 6	GO:0042302	structural constituent of cuticle
LOC100159435	2.60114	1.37914	1.84e-15	5.91e-13	Up	Facilitated trehalose transporter Tret1	GO:0005886,GO:0015574,GO:0015771,GO:0016021	plasma membrane|trehalose transmembrane transporter activity|trehalose transport|integral component of membrane
LOC100167772	2.53962	1.34461	0.0166122	0.210967	Up	Serine protease snake	GO:0004252,GO:0005576,GO:0006508,GO:0007311,GO:0008063,GO:0008233,GO:0008236,GO:0009950,GO:0016485	serine-type endopeptidase activity|extracellular region|proteolysis|maternal specification of dorsal/ventral axis, oocyte, germ-line encoded|Toll signaling pathway|peptidase activity|serine-type peptidase activity|dorsal/ventral axis specification|protein processing
LOC100575039	2.53703	1.34314	0.00470413	0.0790272	Up	Limulus clotting factor C	GO:0004252,GO:0005576,GO:0007155,GO:0030246,GO:0042381	serine-type endopeptidase activity|extracellular region|cell adhesion|carbohydrate binding|hemolymph coagulation
LOC100574855	2.51313	1.32949	0.00875709	0.128538	Up
LOC100570649	2.44248	1.28835	0.0423382	0.392704	Up	Peroxidasin homolog	GO:0004601,GO:0005152,GO:0005201,GO:0005576,GO:0005615,GO:0005783,GO:0006955,GO:0006979,GO:0020037,GO:0030198,GO:0042744,GO:0046872,GO:0055114,GO:0062023,GO:0070062	peroxidase activity|interleukin-1 receptor antagonist activity|extracellular matrix structural constituent|extracellular region|extracellular space|endoplasmic reticulum|immune response|response to oxidative stress|heme binding|extracellular matrix organization|hydrogen peroxide catabolic process|metal ion binding|oxidation-reduction process|collagen-containing extracellular matrix|extracellular …
LOC100165676	2.42145	1.27587	0.0325263	0.33139	Up	Hephaestin	GO:0004322,GO:0005507,GO:0005615,GO:0005622,GO:0005886,GO:0006825,GO:0006826,GO:0006879,GO:0008198,GO:0016021,GO:0016323,GO:0016722,GO:0048471	ferroxidase activity|copper ion binding|extracellular space|intracellular|plasma membrane|copper ion transport|iron ion transport|cellular iron ion homeostasis|ferrous iron binding|integral component of membrane|basolateral plasma membrane|oxidoreductase activity, oxidizing metal ions|perinuclear region of cytoplasm
LOC100571999	2.37735	1.24935	0.00463393	0.0782119	Up
LOC100160762	2.3531	1.23456	0.00326312	0.0591631	Up	Alpha-tocopherol transfer protein-like
LOC100163566	2.34744	1.23109	0.000601074	0.0151467	Up
LOC107882136	2.31144	1.20879	0.000974076	0.0229417	Up	Aminopeptidase N	GO:0001525,GO:0004177,GO:0005737,GO:0005886,GO:0006508,GO:0008270,GO:0016021,GO:0030154,GO:0031526,GO:0035814,GO:0042277,GO:0043171,GO:0070006	angiogenesis|aminopeptidase activity|cytoplasm|plasma membrane|proteolysis|zinc ion binding|integral component of membrane|cell differentiation|brush border membrane|negative regulation of renal sodium excretion|peptide binding|peptide catabolic process|metalloaminopeptidase activity	ko00480,ko04640,ko04614	Glutathione metabolism|Hematopoietic cell lineage|Renin-angiotensin system
LOC100161750	2.29087	1.1959	1.07e-05	0.000524153	Up				ko04142	Lysosome
LOC107884120	2.28436	1.19179	0.0206501	0.245982	Up	Modular serine protease	GO:0004252,GO:0005576,GO:0006508,GO:0008592,GO:0045087,GO:0050830	serine-type endopeptidase activity|extracellular region|proteolysis|regulation of Toll signaling pathway|innate immune response|defense response to Gram-positive bacterium
cp10	2.28276	1.19078	8.84e-07	6.15e-05	Up	Cuticle protein 19.8	GO:0042302	structural constituent of cuticle
LOC100165962	2.26753	1.18112	3e-05	0.00123283	Up	Glucose dehydrogenase [FAD, quinone]	GO:0005576,GO:0016614,GO:0050660	extracellular region|oxidoreductase activity, acting on CH-OH group of donors|flavin adenine dinucleotide binding
LOC103309664	2.25704	1.17443	7.23e-07	5.16e-05	Up
LOC100573594	2.24048	1.16381	1.47e-20	7.84e-18	Up	Follistatin	GO:0000122,GO:0001501,GO:0002244,GO:0005615,GO:0005634,GO:0005737,GO:0007276,GO:0007389,GO:0008585,GO:0030509,GO:0031069,GO:0032926,GO:0038102,GO:0042475,GO:0043395,GO:0043616,GO:0045596,GO:0048185,GO:0051798	negative regulation of transcription by RNA polymerase II|skeletal system development|hematopoietic progenitor cell differentiation|extracellular space|nucleus|cytoplasm|gamete generation|pattern specification process|female gonad development|BMP signaling pathway|hair follicle morphogenesis|negative regulation of activin receptor signaling pathway|activin receptor antagonist activity|odontogenes…	ko04350	TGF-beta signaling pathway
LOC100162036	2.23127	1.15786	5.45e-05	0.00199218	Up
LOC100166768	2.21379	1.14652	0.000761302	0.018599	Up
LOC100166574	2.21287	1.14592	0.000133796	0.00433379	Up	La-related protein 6	GO:0005634,GO:0005737,GO:0005844,GO:0006396,GO:0017022,GO:0032967,GO:0035613,GO:0045727,GO:0048027,GO:1902416,GO:1990825,GO:1990904	nucleus|cytoplasm|polysome|RNA processing|myosin binding|positive regulation of collagen biosynthetic process|RNA stem-loop binding|positive regulation of translation|mRNA 5'-UTR binding|positive regulation of mRNA binding|sequence-specific mRNA binding|ribonucleoprotein complex
LOC100569094	2.20104	1.13819	0.00187155	0.0389272	Up
LOC100165911	2.1967	1.13534	1.97e-05	0.000864678	Up	Cytochrome b5-related protein	GO:0005739,GO:0006629,GO:0016021,GO:0016491,GO:0020037,GO:0046872	mitochondrion|lipid metabolic process|integral component of membrane|oxidoreductase activity|heme binding|metal ion binding
LOC100166964	2.18746	1.12926	0.00330471	0.0597668	Up	Angiotensin-converting enzyme-related protein	GO:0002027,GO:0003007,GO:0004180,GO:0004222,GO:0005576,GO:0005615,GO:0005886,GO:0006508,GO:0007507,GO:0008237,GO:0008238,GO:0008239,GO:0008241,GO:0008270,GO:0030431,GO:0045938	regulation of heart rate|heart morphogenesis|carboxypeptidase activity|metalloendopeptidase activity|extracellular region|extracellular space|plasma membrane|proteolysis|heart development|metallopeptidase activity|exopeptidase activity|dipeptidyl-peptidase activity|peptidyl-dipeptidase activity|zinc ion binding|sleep|positive regulation of circadian sleep/wake cycle, sleep
LOC100162770	2.18047	1.12464	0.000517909	0.0134507	Up
LOC100161673	2.17033	1.11792	0.000595647	0.0150362	Up	Putative defense protein Hdd11	GO:0005576,GO:0042742,GO:0042832,GO:0045087	extracellular region|defense response to bacterium|defense response to protozoan|innate immune response
LOC115033024	2.15962	1.11078	0.0161637	0.206546	Up	Limulus clotting factor C	GO:0004252,GO:0005576,GO:0007155,GO:0030246,GO:0042381	serine-type endopeptidase activity|extracellular region|cell adhesion|carbohydrate binding|hemolymph coagulation
LOC100163840	2.15405	1.10705	0.000240035	0.00716329	Up	Arylsulfatase B	GO:0003943,GO:0004065,GO:0005739,GO:0005764,GO:0005791,GO:0005794,GO:0006914,GO:0007417,GO:0007584,GO:0008484,GO:0009268,GO:0009986,GO:0010632,GO:0010976,GO:0043627,GO:0046872,GO:0051597,GO:0061580,GO:0097065	N-acetylgalactosamine-4-sulfatase activity|arylsulfatase activity|mitochondrion|lysosome|rough endoplasmic reticulum|Golgi apparatus|autophagy|central nervous system development|response to nutrient|sulfuric ester hydrolase activity|response to pH|cell surface|regulation of epithelial cell migration|positive regulation of neuron projection development|response to estrogen|metal ion binding|respon…
LOC100569327	2.15177	1.10552	0.00263549	0.0503818	Up
LOC100163179	2.14377	1.10015	0.00063489	0.0158327	Up	Protein takeout	GO:0005576,GO:0005615,GO:0007617,GO:0007622,GO:0007623,GO:0007631,GO:0008049,GO:0008343,GO:0042594,GO:0042595	extracellular region|extracellular space|mating behavior|rhythmic behavior|circadian rhythm|feeding behavior|male courtship behavior|adult feeding behavior|response to starvation|behavioral response to starvation
LOC100569225	2.12422	1.08693	3.76e-05	0.00146946	Up
LOC100573041	2.1216	1.08515	0.00108645	0.0247785	Up
LOC100168038	2.11713	1.08211	1.25e-06	8.21e-05	Up	Protein-glutamate O-methyltransferase	GO:0008757,GO:0032259,GO:0051998,GO:2001020	S-adenosylmethionine-dependent methyltransferase activity|methylation|protein carboxyl O-methyltransferase activity|regulation of response to DNA damage stimulus
LOC100568898	2.09848	1.06934	0.0238734	0.269934	Up	Orexin receptor type 2	GO:0004930,GO:0005887,GO:0007186,GO:0007200,GO:0007218,GO:0007631,GO:0010840,GO:0016499,GO:0017046,GO:0022410,GO:0051480	G protein-coupled receptor activity|integral component of plasma membrane|G protein-coupled receptor signaling pathway|phospholipase C-activating G protein-coupled receptor signaling pathway|neuropeptide signaling pathway|feeding behavior|regulation of circadian sleep/wake cycle, wakefulness|orexin receptor activity|peptide hormone binding|circadian sleep/wake cycle process|regulation of cytosoli…	ko04080	Neuroactive ligand-receptor interaction
LOC100168964	2.09047	1.06383	0.00147088	0.0318338	Up	Aromatic-L-amino-acid decarboxylase	GO:0004058,GO:0006520,GO:0030170,GO:0042423	aromatic-L-amino-acid decarboxylase activity|cellular amino acid metabolic process|pyridoxal phosphate binding|catecholamine biosynthetic process	ko04728,ko00901,ko00380,ko00950,ko00350,ko00340,ko00965,ko04726,ko00360	Dopaminergic synapse|Indole alkaloid biosynthesis|Tryptophan metabolism|Isoquinoline alkaloid biosynthesis|Tyrosine metabolism|Histidine metabolism|Betalain biosynthesis|Serotonergic synapse|Phenylalanine metabolism
LOC100161006	2.06967	1.0494	0.00109433	0.024919	Up	Glucose dehydrogenase [FAD, quinone]	GO:0005576,GO:0016614,GO:0050660	extracellular region|oxidoreductase activity, acting on CH-OH group of donors|flavin adenine dinucleotide binding	ko00260	Glycine, serine and threonine metabolism
LOC100169416	2.06798	1.04822	0.00166782	0.0353009	Up	Modular serine protease	GO:0004252,GO:0005576,GO:0006508,GO:0008592,GO:0045087,GO:0050830	serine-type endopeptidase activity|extracellular region|proteolysis|regulation of Toll signaling pathway|innate immune response|defense response to Gram-positive bacterium
LOC100164120	2.0673	1.04774	0.000271276	0.0079475	Up
LOC100166950	2.05983	1.04252	0.00200674	0.0413217	Up
LOC100568787	2.05975	1.04247	0.0116865	0.160734	Up	Nose resistant to fluoxetine protein 6	GO:0006869,GO:0007275,GO:0008289,GO:0016021,GO:0016747	lipid transport|multicellular organism development|lipid binding|integral component of membrane|transferase activity, transferring acyl groups other than amino-acyl groups
LOC100569509	2.04672	1.03331	1.88e-06	0.000114485	Up	ABC transporter G family member 23	GO:0005524,GO:0016021,GO:0016887	ATP binding|integral component of membrane|ATPase activity
cp76	2.04392	1.03134	3.53e-05	0.00140317	Up	Pro-resilin	GO:0005576,GO:0008010,GO:0008061,GO:0030023,GO:0031012,GO:0032992,GO:0040003,GO:0042302	extracellular region|structural constituent of chitin-based larval cuticle|chitin binding|extracellular matrix constituent conferring elasticity|extracellular matrix|protein-carbohydrate complex|chitin-based cuticle development|structural constituent of cuticle
LOC103308689	2.02891	1.0207	6.14e-08	6.23e-06	Up
Y-y	2.02644	1.01895	0.000243091	0.00722948	Up	Protein yellow	GO:0005576,GO:0007275,GO:0042438,GO:0060179	extracellular region|multicellular organism development|melanin biosynthetic process|male mating behavior
LOC100569297	2.00063	1.00045	0.00113147	0.0254829	Up	Fatty acid synthase	GO:0004312,GO:0004313,GO:0004314,GO:0004315,GO:0004316,GO:0004320,GO:0005737,GO:0005739,GO:0005794,GO:0005829,GO:0005886,GO:0006084,GO:0006633,GO:0008144,GO:0008611,GO:0009888,GO:0016295,GO:0016296,GO:0030223,GO:0030224,GO:0030879,GO:0031177,GO:0042470,GO:0042587,GO:0042802,GO:0042803,GO:0043170,GO:0047117,GO:0047451,GO:0048468,GO:0070402,GO:0071353,GO:0090557,GO:0102131,GO:0102132	fatty acid synthase activity|[acyl-carrier-protein] S-acetyltransferase activity|[acyl-carrier-protein] S-malonyltransferase activity|3-oxoacyl-[acyl-carrier-protein] synthase activity|3-oxoacyl-[acyl-carrier-protein] reductase (NADPH) activity|oleoyl-[acyl-carrier-protein] hydrolase activity|cytoplasm|mitochondrion|Golgi apparatus|cytosol|plasma membrane|acetyl-CoA metabolic process|fatty acid b…
LOC100160919	1.99946	0.999612	0.00643996	0.101338	Up
LOC100575094	1.98643	0.990176	0.0467513	0.418295	Up
LOC100575811	1.97981	0.98536	0.0130603	0.175264	Up	Adult-specific cuticular protein ACP-20	GO:0042302	structural constituent of cuticle
LOC100169317	1.97419	0.98126	3.8e-05	0.00148074	Up
cp11	1.97305	0.980431	2.9e-06	0.000167984	Up	Cuticle protein 19	GO:0042302	structural constituent of cuticle
LOC100167736	1.97266	0.980141	0.000130089	0.00423274	Up
LOC100158876	1.96391	0.973726	1.39e-09	1.86e-07	Up	Serine protease snake	GO:0004252,GO:0005576,GO:0006508,GO:0007311,GO:0008063,GO:0008233,GO:0008236,GO:0009950,GO:0016485	serine-type endopeptidase activity|extracellular region|proteolysis|maternal specification of dorsal/ventral axis, oocyte, germ-line encoded|Toll signaling pathway|peptidase activity|serine-type peptidase activity|dorsal/ventral axis specification|protein processing
LOC100166008	1.95411	0.966508	3.85e-05	0.0014961	Up
LOC100166678	1.94908	0.962796	2.68e-05	0.0011281	Up
LOC103309809	1.94325	0.958471	0.0384203	0.368212	Up	Protein CREBRF homolog	GO:0003677,GO:0003700,GO:0005634,GO:0005829,GO:0006986,GO:0038202,GO:0042594,GO:0045893,GO:0046982	DNA binding|DNA-binding transcription factor activity|nucleus|cytosol|response to unfolded protein|TORC1 signaling|response to starvation|positive regulation of transcription, DNA-templated|protein heterodimerization activity
LOC100159797	1.93799	0.954563	2.51e-07	2.03e-05	Up	Fatty acyl-CoA reductase wat	GO:0005737,GO:0005777,GO:0006629,GO:0010025,GO:0016021,GO:0016324,GO:0035002,GO:0035149,GO:0035336,GO:0045177,GO:0050062,GO:0055114,GO:0080019	cytoplasm|peroxisome|lipid metabolic process|wax biosynthetic process|integral component of membrane|apical plasma membrane|liquid clearance, open tracheal system|lumen formation, open tracheal system|long-chain fatty-acyl-CoA metabolic process|apical part of cell|long-chain-fatty-acyl-CoA reductase activity|oxidation-reduction process|fatty-acyl-CoA reductase (alcohol-forming) activity	ko04212,ko00073,ko04146	Longevity regulating pathway - worm|Cutin, suberine and wax biosynthesis|Peroxisome
LOC100574854	1.93735	0.954088	1.98e-05	0.000866619	Up	Limulus clotting factor C	GO:0004252,GO:0005576,GO:0007155,GO:0030246,GO:0042381	serine-type endopeptidase activity|extracellular region|cell adhesion|carbohydrate binding|hemolymph coagulation
LOC100160836	1.93142	0.949663	0.0451535	0.40892	Up
LOC100165956	1.91166	0.934824	0.00337334	0.0605656	Up	Nose resistant to fluoxetine protein 6	GO:0006869,GO:0007275,GO:0008289,GO:0016021,GO:0016747	lipid transport|multicellular organism development|lipid binding|integral component of membrane|transferase activity, transferring acyl groups other than amino-acyl groups
LOC100159682	1.90524	0.92997	4.87e-05	0.00182482	Up	Catalase			ko04011,ko00380,ko04212,ko00630,ko04146,ko01200,ko04211,ko04068,ko04213	MAPK signaling pathway - yeast|Tryptophan metabolism|Longevity regulating pathway - worm|Glyoxylate and dicarboxylate metabolism|Peroxisome|Carbon metabolism|Longevity regulating pathway|FoxO signaling pathway|Longevity regulating pathway - multiple species
LOC100572191	1.89954	0.925648	0.00156548	0.033479	Up	Zinc finger protein GLIS2	GO:0000122,GO:0000977,GO:0000981,GO:0001077,GO:0001822,GO:0003677,GO:0003700,GO:0005634,GO:0005667,GO:0005737,GO:0006357,GO:0007399,GO:0016607,GO:0043433,GO:0044212,GO:0045879,GO:0045892,GO:0045893,GO:0045944,GO:0046872,GO:0060994,GO:0061005,GO:0097730,GO:1900182	negative regulation of transcription by RNA polymerase II|RNA polymerase II regulatory region sequence-specific DNA binding|DNA-binding transcription factor activity, RNA polymerase II-specific|proximal promoter DNA-binding transcription activator activity, RNA polymerase II-specific|kidney development|DNA binding|DNA-binding transcription factor activity|nucleus|transcription factor complex|cyto…
LOC100169629	1.89696	0.923692	0.0224742	0.260195	Up	Short-chain dehydrogenase/reductase family 16C member 6	GO:0005811,GO:0016491	lipid droplet|oxidoreductase activity
LOC103307910	1.89293	0.920622	0.00391358	0.0680463	Up
LOC100168043	1.88758	0.916538	0.000156876	0.00500269	Up
LOC100572794	1.88569	0.915093	0.00110771	0.0251424	Up
LOC100164631	1.88448	0.914167	6.56e-05	0.00232784	Up	Serine protease snake	GO:0004252,GO:0005576,GO:0006508,GO:0007311,GO:0008063,GO:0008233,GO:0008236,GO:0009950,GO:0016485	serine-type endopeptidase activity|extracellular region|proteolysis|maternal specification of dorsal/ventral axis, oocyte, germ-line encoded|Toll signaling pathway|peptidase activity|serine-type peptidase activity|dorsal/ventral axis specification|protein processing
LOC107882750	1.87935	0.910237	0.00852826	0.126078	Up	Fatty acid synthase	GO:0004312,GO:0004313,GO:0004314,GO:0004315,GO:0004316,GO:0004320,GO:0005737,GO:0005739,GO:0005794,GO:0005829,GO:0005886,GO:0006084,GO:0006633,GO:0008144,GO:0008611,GO:0009888,GO:0016295,GO:0016296,GO:0030223,GO:0030224,GO:0030879,GO:0031177,GO:0042470,GO:0042587,GO:0042802,GO:0042803,GO:0043170,GO:0047117,GO:0047451,GO:0048468,GO:0070402,GO:0071353,GO:0090557,GO:0102131,GO:0102132	fatty acid synthase activity|[acyl-carrier-protein] S-acetyltransferase activity|[acyl-carrier-protein] S-malonyltransferase activity|3-oxoacyl-[acyl-carrier-protein] synthase activity|3-oxoacyl-[acyl-carrier-protein] reductase (NADPH) activity|oleoyl-[acyl-carrier-protein] hydrolase activity|cytoplasm|mitochondrion|Golgi apparatus|cytosol|plasma membrane|acetyl-CoA metabolic process|fatty acid b…
LOC100169332	1.87267	0.905096	0.00201947	0.0414653	Up	Acidic amino acid decarboxylase GADL1	GO:0004068,GO:0004782,GO:0019752,GO:0030170	aspartate 1-decarboxylase activity|sulfinoalanine decarboxylase activity|carboxylic acid metabolic process|pyridoxal phosphate binding
LOC100161961	1.87215	0.904695	5.11e-06	0.000281237	Up	Cholinesterase	GO:0001540,GO:0003824,GO:0003990,GO:0004104,GO:0005576,GO:0005641,GO:0005788,GO:0007612,GO:0008285,GO:0014016,GO:0016020,GO:0016788,GO:0019695,GO:0019899,GO:0033265,GO:0042802,GO:0043279,GO:0050783,GO:0050805,GO:0051384,GO:0051593,GO:0072562	amyloid-beta binding|catalytic activity|acetylcholinesterase activity|cholinesterase activity|extracellular region|nuclear envelope lumen|endoplasmic reticulum lumen|learning|negative regulation of cell proliferation|neuroblast differentiation|membrane|hydrolase activity, acting on ester bonds|choline metabolic process|enzyme binding|choline binding|identical protein binding|response to alkaloid|…
LOC100162732	1.86551	0.89957	1.19e-06	7.96e-05	Up	Chitotriosidase-1	GO:0000272,GO:0004568,GO:0005576,GO:0005615,GO:0005764,GO:0006032,GO:0008061,GO:0008843	polysaccharide catabolic process|chitinase activity|extracellular region|extracellular space|lysosome|chitin catabolic process|chitin binding|endochitinase activity
LOC100571874	1.86068	0.895827	1.92e-05	0.000842737	Up	UDP-glucuronosyltransferase 2B37	GO:0005789,GO:0008194,GO:0015020,GO:0016021,GO:0031090,GO:0043231	endoplasmic reticulum membrane|UDP-glycosyltransferase activity|glucuronosyltransferase activity|integral component of membrane|organelle membrane|intracellular membrane-bounded organelle	ko00982,ko00980,ko00140,ko00040,ko00830,ko00860,ko00983,ko00053,ko00500	Drug metabolism - cytochrome P450|Metabolism of xenobiotics by cytochrome P450|Steroid hormone biosynthesis|Pentose and glucuronate interconversions|Retinol metabolism|Porphyrin and chlorophyll metabolism|Drug metabolism - other enzymes|Ascorbate and aldarate metabolism|Starch and sucrose metabolism
LOC100163970	1.85917	0.894662	6.77e-05	0.00239009	Up	Elongation of very long chain fatty acids protein AAEL008004	GO:0006633,GO:0030176,GO:0102336,GO:0102337,GO:0102338,GO:0102756	fatty acid biosynthetic process|integral component of endoplasmic reticulum membrane|3-oxo-arachidoyl-CoA synthase activity|3-oxo-cerotoyl-CoA synthase activity|3-oxo-lignoceronyl-CoA synthase activity|very-long-chain 3-ketoacyl-CoA synthase activity
LOC100168782	1.85757	0.893419	3.41e-05	0.00137206	Up	Protein takeout	GO:0005576,GO:0005615,GO:0007617,GO:0007622,GO:0007623,GO:0007631,GO:0008049,GO:0008343,GO:0042594,GO:0042595	extracellular region|extracellular space|mating behavior|rhythmic behavior|circadian rhythm|feeding behavior|male courtship behavior|adult feeding behavior|response to starvation|behavioral response to starvation
LOC100167181	1.85118	0.888445	0.021879	0.255149	Up	Acetyl-coenzyme A transporter 1			ko00604	Glycosphingolipid biosynthesis - ganglio series
LOC100573490	1.84848	0.886342	2.61e-05	0.00110437	Up
LOC100163825	1.83287	0.874106	0.0237706	0.269155	Up	Glucose dehydrogenase [FAD, quinone]	GO:0005576,GO:0016614,GO:0050660	extracellular region|oxidoreductase activity, acting on CH-OH group of donors|flavin adenine dinucleotide binding
LOC100160947	1.81735	0.861837	0.00752423	0.114524	Up
LOC100575697	1.81203	0.857605	0.0329257	0.333515	Up
LOC100159527	1.81095	0.856746	6.94e-05	0.00243498	Up	Cuticle protein 6	GO:0042302	structural constituent of cuticle
LOC100168655	1.80704	0.85363	0.00256974	0.049519	Up	Scavenger receptor class B member 1	GO:0001530,GO:0001540,GO:0001618,GO:0001786,GO:0001875,GO:0001935,GO:0005044,GO:0005215,GO:0005545,GO:0005765,GO:0005886,GO:0005887,GO:0005901,GO:0006702,GO:0006707,GO:0006898,GO:0008035,GO:0009986,GO:0010595,GO:0010867,GO:0010886,GO:0010899,GO:0015914,GO:0015920,GO:0030169,GO:0030666,GO:0031528,GO:0032497,GO:0033344,GO:0034185,GO:0034186,GO:0034375,GO:0034383,GO:0034384,GO:0035461,GO:0042060,GO:…	lipopolysaccharide binding|amyloid-beta binding|virus receptor activity|phosphatidylserine binding|lipopolysaccharide receptor activity|endothelial cell proliferation|scavenger receptor activity|transporter activity|1-phosphatidylinositol binding|lysosomal membrane|plasma membrane|integral component of plasma membrane|caveola|androgen biosynthetic process|cholesterol catabolic process|receptor-me…
LOC100164574	1.80697	0.853573	2.4e-08	2.68e-06	Up
LOC100169385	1.80295	0.850362	0.0495909	0.434863	Up	Peroxidase	GO:0004601,GO:0005576,GO:0006979,GO:0007306,GO:0020037,GO:0042600,GO:0042744,GO:0045471,GO:0046872	peroxidase activity|extracellular region|response to oxidative stress|eggshell chorion assembly|heme binding|chorion|hydrogen peroxide catabolic process|response to ethanol|metal ion binding
cp31	1.79967	0.847736	0.000358623	0.0100373	Up	Cuticle protein 7	GO:0042302	structural constituent of cuticle
LOC100164389	1.78846	0.838719	0.00113095	0.0254829	Up
LOC100159182	1.78566	0.836454	0.0264237	0.289196	Up	Sterile alpha and TIR motif-containing protein 1	GO:0005737,GO:0007165,GO:0030424,GO:0030425,GO:0034128,GO:0035591,GO:0043005,GO:0043025,GO:0045087,GO:0048678,GO:1901214	cytoplasm|signal transduction|axon|dendrite|negative regulation of MyD88-independent toll-like receptor signaling pathway|signaling adaptor activity|neuron projection|neuronal cell body|innate immune response|response to axon injury|regulation of neuron death
LOC100161332	1.7808	0.832528	0.0495079	0.434861	Up
LOC100572806	1.77356	0.826648	0.0243074	0.273084	Up
LOC100161201	1.77197	0.825352	0.00252143	0.0490209	Up
LOC100572705	1.77181	0.825227	0.00352979	0.0627566	Up	Growth/differentiation factor 8	GO:0005125,GO:0005615,GO:0008083,GO:0008201,GO:0010592,GO:0010759,GO:0014839,GO:0042802,GO:1902723,GO:1902725,GO:2000818	cytokine activity|extracellular space|growth factor activity|heparin binding|positive regulation of lamellipodium assembly|positive regulation of macrophage chemotaxis|myoblast migration involved in skeletal muscle regeneration|identical protein binding|negative regulation of skeletal muscle satellite cell proliferation|negative regulation of satellite cell differentiation|negative regulation of …
cprr1-8	1.76988	0.823649	0.000938465	0.0222484	Up	Endocuticle structural glycoprotein SgAbd-2	GO:0042302	structural constituent of cuticle
LOC100162969	1.76602	0.8205	0.00871312	0.128023	Up
LOC100168750	1.76238	0.817525	1.09e-05	0.000529279	Up	Aminopeptidase N	GO:0001525,GO:0001618,GO:0004177,GO:0005615,GO:0005737,GO:0005765,GO:0005793,GO:0005886,GO:0006508,GO:0008237,GO:0008270,GO:0009897,GO:0016021,GO:0030154,GO:0030667,GO:0038023,GO:0042277,GO:0043171,GO:0043312,GO:0070006,GO:0070062	angiogenesis|virus receptor activity|aminopeptidase activity|extracellular space|cytoplasm|lysosomal membrane|endoplasmic reticulum-Golgi intermediate compartment|plasma membrane|proteolysis|metallopeptidase activity|zinc ion binding|external side of plasma membrane|integral component of membrane|cell differentiation|secretory granule membrane|signaling receptor activity|peptide binding|peptide c…	ko00480,ko04640,ko04614	Glutathione metabolism|Hematopoietic cell lineage|Renin-angiotensin system
LOC100569458	1.74378	0.802216	0.0267641	0.291813	Up	Limulus clotting factor C	GO:0004252,GO:0005576,GO:0007155,GO:0030246,GO:0042381	serine-type endopeptidase activity|extracellular region|cell adhesion|carbohydrate binding|hemolymph coagulation
LOC100568508	1.73912	0.798357	0.00220658	0.0441133	Up	Thiamine transporter 1	GO:0005886,GO:0015234,GO:0015888,GO:0016021,GO:0055085,GO:0071934	plasma membrane|thiamine transmembrane transporter activity|thiamine transport|integral component of membrane|transmembrane transport|thiamine transmembrane transport	ko04977	Vitamin digestion and absorption
LOC115033032	1.73623	0.795959	0.0119484	0.163246	Up	Limulus clotting factor C	GO:0004252,GO:0005576,GO:0007155,GO:0030246,GO:0042381	serine-type endopeptidase activity|extracellular region|cell adhesion|carbohydrate binding|hemolymph coagulation
cp12	1.73253	0.792878	1.32e-07	1.22e-05	Up	Cuticle protein 19	GO:0042302	structural constituent of cuticle
ACYPI24610	1.72344	0.785291	0.000169865	0.00534594	Up
ORF4	1.71991	0.782332	0.0137794	0.18272	Up	Ejaculatory bulb-specific protein 3	GO:0005576,GO:0007552,GO:0009615,GO:0045297	extracellular region|metamorphosis|response to virus|post-mating behavior
LOC100168229	1.71795	0.780687	0.00463985	0.0782119	Up	Mediator of RNA polymerase II transcription subunit 25	GO:0002805,GO:0003712,GO:0005654,GO:0006357,GO:0007399,GO:0016592	regulation of antimicrobial peptide biosynthetic process|transcription coregulator activity|nucleoplasm|regulation of transcription by RNA polymerase II|nervous system development|mediator complex
LOC100167657	1.71138	0.775161	0.0317023	0.325699	Up
LOC100164407	1.71041	0.774342	0.0124137	0.168627	Up
LOC103310723	1.70683	0.771315	2.18e-10	3.45e-08	Up	Aromatic amino acid aminotransferase DDB_G0287711	GO:0005737,GO:0009058,GO:0030170,GO:0080130	cytoplasm|biosynthetic process|pyridoxal phosphate binding|L-phenylalanine:2-oxoglutarate aminotransferase activity	ko01210,ko00310,ko01230,ko00300,ko00380	2-Oxocarboxylic acid metabolism|Lysine degradation|Biosynthesis of amino acids|Lysine biosynthesis|Tryptophan metabolism
LOC100574470	1.70014	0.765652	6.98e-06	0.000367228	Up
LOC100572547	1.68988	0.756921	0.000373156	0.0103237	Up
LOC100569590	1.68911	0.75626	0.0345824	0.34401	Up
cp43	1.68838	0.755641	0.00214706	0.0432693	Up	Cuticle protein 8	GO:0042302	structural constituent of cuticle
LOC100162594	1.68828	0.75555	0.00196391	0.0405556	Up	Probable cytochrome P450 6a14	GO:0004497,GO:0005506,GO:0005789,GO:0016705,GO:0020037,GO:0031090	monooxygenase activity|iron ion binding|endoplasmic reticulum membrane|oxidoreductase activity, acting on paired donors, with incorporation or reduction of molecular oxygen|heme binding|organelle membrane
LOC100159832	1.68426	0.752112	0.000205567	0.00623798	Up	Transferrin	GO:0005615,GO:0006811,GO:0046872,GO:0055072	extracellular space|ion transport|metal ion binding|iron ion homeostasis
LOC100572293	1.68358	0.751531	1.22e-05	0.000580948	Up
LOC100167028	1.67706	0.745931	0.00207685	0.0422754	Up	Beta-alanine-activating enzyme	GO:0005524,GO:0006631,GO:0016878,GO:0019482,GO:0043041	ATP binding|fatty acid metabolic process|acid-thiol ligase activity|beta-alanine metabolic process|amino acid activation for nonribosomal peptide biosynthetic process
LOC100570877	1.67645	0.745409	0.00176187	0.0369658	Up
LOC100163652	1.67476	0.743956	0.00540508	0.0886334	Up	Cytochrome P450 18a1	GO:0005506,GO:0005737,GO:0005789,GO:0006082,GO:0006805,GO:0007304,GO:0007480,GO:0007552,GO:0008395,GO:0016021,GO:0016712,GO:0020037,GO:0031090,GO:0035074,GO:0035210,GO:0042738,GO:0043231,GO:0046344,GO:0055114	iron ion binding|cytoplasm|endoplasmic reticulum membrane|organic acid metabolic process|xenobiotic metabolic process|chorion-containing eggshell formation|imaginal disc-derived leg morphogenesis|metamorphosis|steroid hydroxylase activity|integral component of membrane|oxidoreductase activity, acting on paired donors, with incorporation or reduction of molecular oxygen, reduced flavin or flavopro…	ko00981	Insect hormone biosynthesis
LOC100159077	1.67307	0.742499	0.00421484	0.0722386	Up	Uncharacterized peptidase C1-like protein F26E4.3	GO:0005044,GO:0005615,GO:0006955,GO:0007155,GO:0008234,GO:0030247	scavenger receptor activity|extracellular space|immune response|cell adhesion|cysteine-type peptidase activity|polysaccharide binding
LOC100160364	1.66805	0.738159	6.51e-22	4.26e-19	Up	Fibroblast growth factor receptor	GO:0005007,GO:0005524,GO:0008284,GO:0016021	fibroblast growth factor-activated receptor activity|ATP binding|positive regulation of cell proliferation|integral component of membrane
cp9	1.66703	0.737282	0.013304	0.17746	Up	Cuticle protein 19	GO:0042302	structural constituent of cuticle
LOC100159355	1.66078	0.731857	1.01e-05	0.000501117	Up	Pyrokinin-1 receptor	GO:0004930,GO:0005887,GO:0007186,GO:0007218,GO:0008188,GO:0016021,GO:0036401,GO:0070328,GO:0090278	G protein-coupled receptor activity|integral component of plasma membrane|G protein-coupled receptor signaling pathway|neuropeptide signaling pathway|neuropeptide receptor activity|integral component of membrane|pyrokinin receptor activity|triglyceride homeostasis|negative regulation of peptide hormone secretion
LOC103308256	1.66006	0.731235	0.0295132	0.310397	Up	Fatty acid synthase	GO:0003697,GO:0004312,GO:0004313,GO:0004314,GO:0004315,GO:0004316,GO:0004320,GO:0005623,GO:0006089,GO:0006633,GO:0016295,GO:0016296,GO:0031177,GO:0032100,GO:0047117,GO:0047451,GO:0102131,GO:0102132	single-stranded DNA binding|fatty acid synthase activity|[acyl-carrier-protein] S-acetyltransferase activity|[acyl-carrier-protein] S-malonyltransferase activity|3-oxoacyl-[acyl-carrier-protein] synthase activity|3-oxoacyl-[acyl-carrier-protein] reductase (NADPH) activity|oleoyl-[acyl-carrier-protein] hydrolase activity|cell|lactate metabolic process|fatty acid biosynthetic process|myristoyl-[acy…
LOC100160377	1.6597	0.730924	0.0229248	0.263357	Up	Modular serine protease	GO:0004252,GO:0005576,GO:0006508,GO:0008592,GO:0045087,GO:0050830	serine-type endopeptidase activity|extracellular region|proteolysis|regulation of Toll signaling pathway|innate immune response|defense response to Gram-positive bacterium
LOC100570822	1.6574	0.728926	0.0427433	0.394636	Up	Adenosine receptor A2a	GO:0001609,GO:0001963,GO:0001975,GO:0005622,GO:0005887,GO:0007189,GO:0007626,GO:0019899,GO:0032230,GO:0042755,GO:0042802,GO:0046636,GO:0050728,GO:0060080,GO:0098794,GO:2001235	G protein-coupled adenosine receptor activity|synaptic transmission, dopaminergic|response to amphetamine|intracellular|integral component of plasma membrane|adenylate cyclase-activating G protein-coupled receptor signaling pathway|locomotory behavior|enzyme binding|positive regulation of synaptic transmission, GABAergic|eating behavior|identical protein binding|negative regulation of alpha-beta …	ko04024,ko04015,ko04020,ko04080,ko04270	cAMP signaling pathway|Rap1 signaling pathway|Calcium signaling pathway|Neuroactive ligand-receptor interaction|Vascular smooth muscle contraction
LOC103308203	1.65641	0.728063	0.000219023	0.00659081	Up
LOC100159163	1.64832	0.720999	3.46e-06	0.000196928	Up	Kynurenine/alpha-aminoadipate aminotransferase, mitochondrial	GO:0005739,GO:0006103,GO:0006536,GO:0009058,GO:0016212,GO:0030170,GO:0033512,GO:0047536,GO:0070189	mitochondrion|2-oxoglutarate metabolic process|glutamate metabolic process|biosynthetic process|kynurenine-oxoglutarate transaminase activity|pyridoxal phosphate binding|L-lysine catabolic process to acetyl-CoA via saccharopine|2-aminoadipate transaminase activity|kynurenine metabolic process	ko01210,ko00310,ko01230,ko00300,ko00380	2-Oxocarboxylic acid metabolism|Lysine degradation|Biosynthesis of amino acids|Lysine biosynthesis|Tryptophan metabolism
LOC100575713	1.64544	0.718477	3.43e-05	0.00137477	Up
LOC100167833	1.64241	0.715814	9.93e-09	1.21e-06	Up
LOC100159662	1.6409	0.714483	0.00590701	0.095667	Up
LOC100168942	1.64019	0.713865	0.000952983	0.0225533	Up
LOC103310638	1.63572	0.709929	3.48e-07	2.67e-05	Up	Cuticle protein 19	GO:0042302	structural constituent of cuticle
cp22	1.63301	0.70753	5.24e-05	0.00194775	Up	Cuticle protein 8	GO:0042302	structural constituent of cuticle
LOC100162435	1.63184	0.7065	0.0033783	0.0605656	Up
cp17	1.62877	0.703787	5.44e-05	0.00199218	Up	Cuticle protein 19	GO:0042302	structural constituent of cuticle
LOC115033631	1.6277	0.70283	1.35e-06	8.75e-05	Up	Fatty acid synthase	GO:0004312,GO:0004313,GO:0004314,GO:0004315,GO:0004316,GO:0004320,GO:0005737,GO:0005739,GO:0005794,GO:0005829,GO:0005886,GO:0006084,GO:0006633,GO:0008144,GO:0008611,GO:0009888,GO:0016295,GO:0016296,GO:0030223,GO:0030224,GO:0030879,GO:0031177,GO:0042470,GO:0042587,GO:0042802,GO:0042803,GO:0043170,GO:0047117,GO:0047451,GO:0048468,GO:0070402,GO:0071353,GO:0090557,GO:0102131,GO:0102132	fatty acid synthase activity|[acyl-carrier-protein] S-acetyltransferase activity|[acyl-carrier-protein] S-malonyltransferase activity|3-oxoacyl-[acyl-carrier-protein] synthase activity|3-oxoacyl-[acyl-carrier-protein] reductase (NADPH) activity|oleoyl-[acyl-carrier-protein] hydrolase activity|cytoplasm|mitochondrion|Golgi apparatus|cytosol|plasma membrane|acetyl-CoA metabolic process|fatty acid b…
LOC100160252	1.62665	0.701906	1.73e-05	0.00077613	Up	Cuticle protein 19	GO:0042302	structural constituent of cuticle
LOC100159905	1.62584	0.701182	9.4e-10	1.28e-07	Up	Protein takeout	GO:0005576,GO:0005615,GO:0007617,GO:0007622,GO:0007623,GO:0007631,GO:0008049,GO:0008343,GO:0042594,GO:0042595	extracellular region|extracellular space|mating behavior|rhythmic behavior|circadian rhythm|feeding behavior|male courtship behavior|adult feeding behavior|response to starvation|behavioral response to starvation
ORF5	1.62377	0.699344	6.32e-05	0.00227221	Up	Putative odorant-binding protein A10	GO:0005576	extracellular region
cp16	1.61736	0.693637	1.31e-05	0.00061388	Up	Cuticle protein 19.8	GO:0042302	structural constituent of cuticle
LOC100571158	1.61643	0.692809	0.0104909	0.147672	Up	Esterase FE4	GO:0052689	carboxylic ester hydrolase activity
LOC100574099	1.61338	0.690087	0.0309499	0.320044	Up	Kelch-like protein 18
LOC100166321	1.60865	0.685852	0.00252348	0.0490209	Up	Angiotensin-converting enzyme (Fragment)	GO:0003081,GO:0003084,GO:0004180,GO:0005615,GO:0005886,GO:0008237,GO:0008238,GO:0008239,GO:0008241,GO:0008270,GO:0008283,GO:0016021,GO:0045777,GO:0060319	regulation of systemic arterial blood pressure by renin-angiotensin|positive regulation of systemic arterial blood pressure|carboxypeptidase activity|extracellular space|plasma membrane|metallopeptidase activity|exopeptidase activity|dipeptidyl-peptidase activity|peptidyl-dipeptidase activity|zinc ion binding|cell proliferation|integral component of membrane|positive regulation of blood pressure|…	ko04614,ko04924	Renin-angiotensin system|Renin secretion
cprr1-4	1.60859	0.685795	0.000158123	0.0050313	Up	Endocuticle structural glycoprotein SgAbd-9	GO:0042302	structural constituent of cuticle
cp41	1.60849	0.685711	0.000310041	0.00880348	Up	Cuticle protein 8	GO:0042302	structural constituent of cuticle
LOC100163964	1.60633	0.683768	3.39e-10	5.04e-08	Up	Cytochrome b5-related protein	GO:0005739,GO:0006629,GO:0016021,GO:0016491,GO:0020037,GO:0046872	mitochondrion|lipid metabolic process|integral component of membrane|oxidoreductase activity|heme binding|metal ion binding
cp7	1.6057	0.683198	0.0013022	0.0287002	Up	Cuticle protein 19	GO:0042302	structural constituent of cuticle
Pla2g7	1.59809	0.676349	1.41e-07	1.3e-05	Up	Platelet-activating factor acetylhydrolase	GO:0003847,GO:0005543,GO:0016042,GO:0034362,GO:0034374,GO:0034440,GO:0034441,GO:0046469,GO:0047499,GO:0090026	1-alkyl-2-acetylglycerophosphocholine esterase activity|phospholipid binding|lipid catabolic process|low-density lipoprotein particle|low-density lipoprotein particle remodeling|lipid oxidation|plasma lipoprotein particle oxidation|platelet activating factor metabolic process|calcium-independent phospholipase A2 activity|positive regulation of monocyte chemotaxis	ko00565	Ether lipid metabolism
LOC115033506	1.59734	0.67567	0.000215535	0.00649942	Up	Proclotting enzyme	GO:0004252,GO:0005576,GO:0030133,GO:0042381,GO:0046872	serine-type endopeptidase activity|extracellular region|transport vesicle|hemolymph coagulation|metal ion binding
LOC100569638	1.59679	0.675177	1.11e-07	1.04e-05	Up	Kynurenine/alpha-aminoadipate aminotransferase, mitochondrial	GO:0005759,GO:0006103,GO:0006536,GO:0006554,GO:0006569,GO:0009058,GO:0016212,GO:0030170,GO:0033512,GO:0042803,GO:0047536,GO:0070189	mitochondrial matrix|2-oxoglutarate metabolic process|glutamate metabolic process|lysine catabolic process|tryptophan catabolic process|biosynthetic process|kynurenine-oxoglutarate transaminase activity|pyridoxal phosphate binding|L-lysine catabolic process to acetyl-CoA via saccharopine|protein homodimerization activity|2-aminoadipate transaminase activity|kynurenine metabolic process	ko01210,ko00310,ko01230,ko00300,ko00380	2-Oxocarboxylic acid metabolism|Lysine degradation|Biosynthesis of amino acids|Lysine biosynthesis|Tryptophan metabolism
LOC100168601	1.59415	0.672785	0.0263941	0.289196	Up	UDP-glucuronosyltransferase 2B13	GO:0005789,GO:0015020,GO:0016021,GO:0031090	endoplasmic reticulum membrane|glucuronosyltransferase activity|integral component of membrane|organelle membrane
LOC100167911	1.58191	0.661672	0.00263389	0.0503818	Up	Pro-resilin	GO:0005576,GO:0008010,GO:0008061,GO:0030023,GO:0031012,GO:0032992,GO:0040003,GO:0042302	extracellular region|structural constituent of chitin-based larval cuticle|chitin binding|extracellular matrix constituent conferring elasticity|extracellular matrix|protein-carbohydrate complex|chitin-based cuticle development|structural constituent of cuticle
LOC100164995	1.58164	0.66142	0.00132917	0.0290524	Up	Zinc finger protein GLIS3	GO:0000122,GO:0000981,GO:0003677,GO:0005634,GO:0006366,GO:0045944,GO:0046872	negative regulation of transcription by RNA polymerase II|DNA-binding transcription factor activity, RNA polymerase II-specific|DNA binding|nucleus|transcription by RNA polymerase II|positive regulation of transcription by RNA polymerase II|metal ion binding
LOC100571496	1.57828	0.658353	9.35e-07	6.42e-05	Up
LOC100165382	1.57759	0.657722	0.0448204	0.40734	Up
LOC100568597	1.57543	0.655745	0.0155927	0.200494	Up	Thiamine transporter 1	GO:0005886,GO:0015234,GO:0015888,GO:0016021,GO:0055085,GO:0071934	plasma membrane|thiamine transmembrane transporter activity|thiamine transport|integral component of membrane|transmembrane transport|thiamine transmembrane transport	ko04977	Vitamin digestion and absorption
LOC100158699	1.57534	0.655667	0.0269481	0.293101	Up	Low-density lipoprotein receptor 2	GO:0005509,GO:0005905,GO:0006869,GO:0006897,GO:0008203,GO:0016021,GO:0034362	calcium ion binding|clathrin-coated pit|lipid transport|endocytosis|cholesterol metabolic process|integral component of membrane|low-density lipoprotein particle
LOC100159556	1.572	0.652603	0.00301152	0.0557915	Up	Glia-derived nexin	GO:0004867,GO:0005102,GO:0005539,GO:0005576,GO:0005615,GO:0005829,GO:0007596,GO:0008201,GO:0008285,GO:0010757,GO:0010766,GO:0010951,GO:0010955,GO:0014067,GO:0021683,GO:0030195,GO:0030308,GO:0030334,GO:0031091,GO:0031232,GO:0031594,GO:0032940,GO:0033363,GO:0042177,GO:0042628,GO:0045861,GO:0045879,GO:0048505,GO:0048711,GO:0050974,GO:0051966,GO:0060291,GO:0060384,GO:0061108,GO:0062023,GO:0090331,GO:…	serine-type endopeptidase inhibitor activity|signaling receptor binding|glycosaminoglycan binding|extracellular region|extracellular space|cytosol|blood coagulation|heparin binding|negative regulation of cell proliferation|negative regulation of plasminogen activation|negative regulation of sodium ion transport|negative regulation of endopeptidase activity|negative regulation of protein processin…
LOC100161211	1.56983	0.650605	0.0030462	0.0560765	Up
LOC100159064	1.56565	0.646766	0.0011806	0.0264242	Up	Circadian clock-controlled protein	GO:0005615,GO:0007623	extracellular space|circadian rhythm
LOC100569753	1.56186	0.643264	0.00166694	0.0353009	Up	Fatty acid synthase	GO:0004312,GO:0004313,GO:0004314,GO:0004315,GO:0004316,GO:0004320,GO:0005737,GO:0005739,GO:0005794,GO:0005829,GO:0005886,GO:0006084,GO:0006633,GO:0008144,GO:0008611,GO:0009888,GO:0016295,GO:0016296,GO:0030223,GO:0030224,GO:0030879,GO:0031177,GO:0042470,GO:0042587,GO:0042802,GO:0042803,GO:0043170,GO:0047117,GO:0047451,GO:0048468,GO:0070402,GO:0071353,GO:0090557,GO:0102131,GO:0102132	fatty acid synthase activity|[acyl-carrier-protein] S-acetyltransferase activity|[acyl-carrier-protein] S-malonyltransferase activity|3-oxoacyl-[acyl-carrier-protein] synthase activity|3-oxoacyl-[acyl-carrier-protein] reductase (NADPH) activity|oleoyl-[acyl-carrier-protein] hydrolase activity|cytoplasm|mitochondrion|Golgi apparatus|cytosol|plasma membrane|acetyl-CoA metabolic process|fatty acid b…
cp62	1.5589	0.640533	0.000126219	0.00412546	Up	Cuticle protein 19.8	GO:0042302	structural constituent of cuticle
LOC100160234	1.55716	0.638915	1.27e-05	0.000596772	Up
LOC100160192	1.55708	0.638844	0.000185053	0.00572394	Up	Probable multidrug resistance-associated protein lethal(2)03659	GO:0005524,GO:0007275,GO:0008514,GO:0015562,GO:0015711,GO:0016020,GO:0016021,GO:0042626,GO:0055085	ATP binding|multicellular organism development|organic anion transmembrane transporter activity|efflux transmembrane transporter activity|organic anion transport|membrane|integral component of membrane|ATPase activity, coupled to transmembrane movement of substances|transmembrane transport
LOC100165764	1.55618	0.638012	0.000259247	0.0076417	Up	Microsomal glutathione S-transferase 1	GO:0004364,GO:0005739,GO:0005741,GO:0005783,GO:0005789,GO:0006749,GO:0016021,GO:0055114,GO:0070207	glutathione transferase activity|mitochondrion|mitochondrial outer membrane|endoplasmic reticulum|endoplasmic reticulum membrane|glutathione metabolic process|integral component of membrane|oxidation-reduction process|protein homotrimerization	ko00982,ko00480,ko00980	Drug metabolism - cytochrome P450|Glutathione metabolism|Metabolism of xenobiotics by cytochrome P450
LOC100164783	1.55048	0.632712	0.00199248	0.0410868	Up
LOC100160097	1.54961	0.631903	3.58e-05	0.00141655	Up	Alpha-tocopherol transfer protein-like
LOC100570753	1.54862	0.63098	3.1e-05	0.00126054	Up
LOC100168857	1.54596	0.628507	0.000488841	0.0129206	Up	Glucose dehydrogenase [FAD, quinone]	GO:0005576,GO:0016614,GO:0050660	extracellular region|oxidoreductase activity, acting on CH-OH group of donors|flavin adenine dinucleotide binding
LOC100165741	1.54435	0.627	5.97e-05	0.00216228	Up	Cuticle protein 8	GO:0042302	structural constituent of cuticle
LOC100160745	1.54332	0.626039	1.96e-07	1.68e-05	Up	Alpha-tocopherol transfer protein-like
LOC100302322	1.54301	0.625745	0.000109284	0.00363793	Up	Cuticle protein 8	GO:0042302	structural constituent of cuticle
LOC100161604	1.54285	0.625602	1.06e-05	0.000524153	Up	Limulus clotting factor C	GO:0004252,GO:0005576,GO:0007155,GO:0030246,GO:0042381	serine-type endopeptidase activity|extracellular region|cell adhesion|carbohydrate binding|hemolymph coagulation
LOC100169171	1.54089	0.623763	0.000111539	0.00369593	Up	Endocuticle structural glycoprotein SgAbd-2	GO:0042302	structural constituent of cuticle
LOC107885159	1.53805	0.621101	0.0047934	0.0801395	Up
LOC100163582	1.53493	0.618168	0.0278561	0.299194	Up	Pancreatic triacylglycerol lipase
LOC100571649	1.53165	0.61509	0.0069826	0.108107	Up
LOC100168265	1.5306	0.614099	0.0315921	0.325263	Up	Peroxidase	GO:0004601,GO:0005576,GO:0006979,GO:0007306,GO:0020037,GO:0042600,GO:0042744,GO:0045471,GO:0046872	peroxidase activity|extracellular region|response to oxidative stress|eggshell chorion assembly|heme binding|chorion|hydrogen peroxide catabolic process|response to ethanol|metal ion binding
LOC100574342	1.52937	0.612936	0.0154617	0.199343	Up
LOC100158916	1.52898	0.61257	1.25e-16	4.75e-14	Up	Sodium-coupled neutral amino acid transporter 9	GO:0003333,GO:0005764,GO:0005765,GO:0005770,GO:0015171,GO:0016021,GO:0031902,GO:0032008,GO:0071230	amino acid transmembrane transport|lysosome|lysosomal membrane|late endosome|amino acid transmembrane transporter activity|integral component of membrane|late endosome membrane|positive regulation of TOR signaling|cellular response to amino acid stimulus	ko04150	mTOR signaling pathway
LOC100572094	1.52821	0.611846	0.026698	0.291314	Up
cp33	1.52626	0.609999	9.74e-08	9.24e-06	Up	Cuticle protein 7	GO:0042302	structural constituent of cuticle
LOC100164042	1.5235	0.607393	7.29e-07	5.18e-05	Up	Probable cytochrome P450 6a14	GO:0004497,GO:0005506,GO:0005789,GO:0016705,GO:0020037,GO:0031090	monooxygenase activity|iron ion binding|endoplasmic reticulum membrane|oxidoreductase activity, acting on paired donors, with incorporation or reduction of molecular oxygen|heme binding|organelle membrane
LOC115033773	1.51987	0.603945	0.0292065	0.308818	Up	Fatty acid synthase	GO:0003697,GO:0004312,GO:0004313,GO:0004314,GO:0004315,GO:0004316,GO:0004320,GO:0005623,GO:0006089,GO:0006633,GO:0016295,GO:0016296,GO:0031177,GO:0032100,GO:0047117,GO:0047451,GO:0102131,GO:0102132	single-stranded DNA binding|fatty acid synthase activity|[acyl-carrier-protein] S-acetyltransferase activity|[acyl-carrier-protein] S-malonyltransferase activity|3-oxoacyl-[acyl-carrier-protein] synthase activity|3-oxoacyl-[acyl-carrier-protein] reductase (NADPH) activity|oleoyl-[acyl-carrier-protein] hydrolase activity|cell|lactate metabolic process|fatty acid biosynthetic process|myristoyl-[acy…
LOC100165323	1.51657	0.600815	0.00273349	0.0519111	Up	Lipase 1	GO:0005576,GO:0007586,GO:0016042,GO:0016298,GO:0044255	extracellular region|digestion|lipid catabolic process|lipase activity|cellular lipid metabolic process
cprr1-7	1.51408	0.598441	8.51e-06	0.000436569	Up	Endocuticle structural glycoprotein SgAbd-4	GO:0042302	structural constituent of cuticle
cp37	1.50588	0.590604	2.94e-07	2.33e-05	Up	Cuticle protein 8	GO:0042302	structural constituent of cuticle
LOC100164352	1.50454	0.589318	0.000198199	0.00606546	Up	Beta-1,3-glucan-binding protein 1	GO:0002752,GO:0004553,GO:0005576,GO:0005975,GO:0008329,GO:0030246,GO:0045087,GO:0045088	cell surface pattern recognition receptor signaling pathway|hydrolase activity, hydrolyzing O-glycosyl compounds|extracellular region|carbohydrate metabolic process|signaling pattern recognition receptor activity|carbohydrate binding|innate immune response|regulation of innate immune response
cp23	1.50274	0.587597	0.000225487	0.00677118	Up	Cuticle protein 8	GO:0042302	structural constituent of cuticle
LOC100165253	0.666599	-0.585108	6.34e-08	6.36e-06	Down
LOC100162489	0.664506	-0.589646	0.0106784	0.14929	Down	Cysteine-rich motor neuron 1 protein	GO:0001558,GO:0004867,GO:0005520,GO:0005576,GO:0016021	regulation of cell growth|serine-type endopeptidase inhibitor activity|insulin-like growth factor binding|extracellular region|integral component of membrane
LOC100166088	0.66407	-0.590593	5.72e-10	8.08e-08	Down
LOC100569865	0.663313	-0.592238	0.00218605	0.0438972	Down
LOC100168339	0.663069	-0.592769	8.79e-19	3.96e-16	Down	SEC14 domain and spectrin repeat-containing protein 1	GO:0005546,GO:0010314,GO:0032266,GO:0034704,GO:0043325,GO:0045111,GO:0070273,GO:0070300,GO:0080025,GO:1904878	phosphatidylinositol-4,5-bisphosphate binding|phosphatidylinositol-5-phosphate binding|phosphatidylinositol-3-phosphate binding|calcium channel complex|phosphatidylinositol-3,4-bisphosphate binding|intermediate filament cytoskeleton|phosphatidylinositol-4-phosphate binding|phosphatidic acid binding|phosphatidylinositol-3,5-bisphosphate binding|negative regulation of calcium ion transmembrane tran…
LOC100159387	0.662786	-0.593384	0.00723373	0.111159	Down	Probable cytochrome P450 6a14	GO:0004497,GO:0005506,GO:0005789,GO:0016705,GO:0020037,GO:0031090	monooxygenase activity|iron ion binding|endoplasmic reticulum membrane|oxidoreductase activity, acting on paired donors, with incorporation or reduction of molecular oxygen|heme binding|organelle membrane
LOC100161935	0.661497	-0.596194	0.011198	0.154903	Down	ATP-dependent RNA helicase DDX54	GO:0003714,GO:0003723,GO:0004004,GO:0005102,GO:0005524,GO:0005634,GO:0005730,GO:0005794,GO:0006396,GO:0016020,GO:0016070,GO:0030331,GO:0030520	transcription corepressor activity|RNA binding|ATP-dependent RNA helicase activity|signaling receptor binding|ATP binding|nucleus|nucleolus|Golgi apparatus|RNA processing|membrane|RNA metabolic process|estrogen receptor binding|intracellular estrogen receptor signaling pathway
LOC100570047	0.660403	-0.598581	5.13e-05	0.00191222	Down
LOC100575633	0.65669	-0.606715	7.88e-08	7.67e-06	Down	Neuroblastoma suppressor of tumorigenicity 1	GO:0005576,GO:0060872,GO:0060876	extracellular region|semicircular canal development|semicircular canal formation	0	TGF-beta signaling pathway
LOC100162875	0.656583	-0.60695	0.000481767	0.0128358	Down
LOC100160767	0.656002	-0.608228	0.0104711	0.147644	Down
LOC100572384	0.655812	-0.608645	0.000142659	0.00458122	Down
LOC100159930	0.651376	-0.618438	4.39e-05	0.00167486	Down	Hillarin	GO:0005938,GO:0032154,GO:0046872	cell cortex|cleavage furrow|metal ion binding
LOC100166901	0.650763	-0.619795	5.61e-24	4.49e-21	Down
Mf-cpa	0.649562	-0.62246	3.67e-08	3.92e-06	Down	Carboxypeptidase A4	GO:0004181,GO:0005615,GO:0006508,GO:0008270,GO:0016573	metallocarboxypeptidase activity|extracellular space|proteolysis|zinc ion binding|histone acetylation
LOC100570868	0.64911	-0.623465	0.0418672	0.389087	Down	Kielin/chordin-like protein	GO:0005576	extracellular region
LOC100160747	0.647416	-0.627235	2.43e-07	1.98e-05	Down
LOC100167307	0.646099	-0.630173	9.49e-10	1.28e-07	Down	Calpain-C	GO:0004198,GO:0005509,GO:0005737,GO:0006508	calcium-dependent cysteine-type endopeptidase activity|calcium ion binding|cytoplasm|proteolysis
LOC100162736	0.645121	-0.632358	3.05e-07	2.39e-05	Down
LOC100169082	0.643906	-0.635077	1.2e-08	1.44e-06	Down
LOC100168329	0.641346	-0.640825	5.73e-12	1.15e-09	Down	Cadherin-89D	GO:0005509,GO:0005887,GO:0007156,GO:0016339,GO:0044331	calcium ion binding|integral component of plasma membrane|homophilic cell adhesion via plasma membrane adhesion molecules|calcium-dependent cell-cell adhesion via plasma membrane cell adhesion molecules|cell-cell adhesion mediated by cadherin
LOC100575717	0.638319	-0.64765	7.91e-09	9.74e-07	Down
LOC100165153	0.638046	-0.648267	3.82e-06	0.000215788	Down
LOC100161958	0.635564	-0.653891	2.21e-08	2.51e-06	Down
LOC100570820	0.635006	-0.655157	0.0273493	0.295734	Down	52 kDa repressor of the inhibitor of the protein kinase	GO:0000981,GO:0003677,GO:0005634,GO:0007165,GO:0008285,GO:0046872,GO:0046983	DNA-binding transcription factor activity, RNA polymerase II-specific|DNA binding|nucleus|signal transduction|negative regulation of cell proliferation|metal ion binding|protein dimerization activity
LOC100164009	0.632006	-0.66199	5.7e-30	8.21e-27	Down
LOC100167683	0.63007	-0.666417	5.44e-15	1.57e-12	Down	Heparan sulfate 2-O-sulfotransferase pipe	GO:0004394,GO:0005634,GO:0005694,GO:0005794,GO:0008146,GO:0009880,GO:0009950,GO:0016485,GO:0030173,GO:0040014,GO:0048477	heparan sulfate 2-O-sulfotransferase activity|nucleus|chromosome|Golgi apparatus|sulfotransferase activity|embryonic pattern specification|dorsal/ventral axis specification|protein processing|integral component of Golgi membrane|regulation of multicellular organism growth|oogenesis
LOC100164376	0.629391	-0.667971	2.18e-07	1.85e-05	Down
LOC103310351	0.627549	-0.672199	0.00818995	0.122586	Down	Growth/differentiation factor 8	GO:0005125,GO:0005615,GO:0008083	cytokine activity|extracellular space|growth factor activity
LOC100165000	0.627353	-0.67265	0.00596135	0.0962078	Down	Enhancer of split mgamma protein	GO:0000122,GO:0000977,GO:0001078,GO:0001756,GO:0002052,GO:0003700,GO:0003714,GO:0005634,GO:0007219,GO:0008134,GO:0030154,GO:0035326,GO:0043565,GO:0046983,GO:0048190,GO:0048749,GO:0050767,GO:0097150,GO:1902692,GO:1990837	negative regulation of transcription by RNA polymerase II|RNA polymerase II regulatory region sequence-specific DNA binding|proximal promoter DNA-binding transcription repressor activity, RNA polymerase II-specific|somitogenesis|positive regulation of neuroblast proliferation|DNA-binding transcription factor activity|transcription corepressor activity|nucleus|Notch signaling pathway|transcription…
LOC100165079	0.627125	-0.673176	2.96e-05	0.00121778	Down
LOC100165431	0.626875	-0.673751	0.00294201	0.0548592	Down	Very-long-chain 3-oxoacyl-CoA reductase	GO:0004303,GO:0005789,GO:0006633,GO:0006703,GO:0016021,GO:0016509,GO:0102339,GO:0102340,GO:0102341,GO:0102342	estradiol 17-beta-dehydrogenase activity|endoplasmic reticulum membrane|fatty acid biosynthetic process|estrogen biosynthetic process|integral component of membrane|long-chain-3-hydroxyacyl-CoA dehydrogenase activity|3-oxo-arachidoyl-CoA reductase activity|3-oxo-behenoyl-CoA reductase activity|3-oxo-lignoceroyl-CoA reductase activity|3-oxo-cerotoyl-CoA reductase activity	ko01212,ko01040,ko00062,ko00140	Fatty acid metabolism|Biosynthesis of unsaturated fatty acids|Fatty acid elongation|Steroid hormone biosynthesis
LOC100568588	0.623528	-0.681474	0.00167425	0.0353851	Down
LOC100159482	0.623497	-0.681546	3.62e-06	0.000205644	Down	PR domain zinc finger protein 1	GO:0000122,GO:0000977,GO:0000978,GO:0001078,GO:0001701,GO:0001763,GO:0001892,GO:0001893,GO:0002250,GO:0003170,GO:0003279,GO:0003281,GO:0005634,GO:0005737,GO:0007281,GO:0008168,GO:0009791,GO:0010628,GO:0010629,GO:0030889,GO:0031490,GO:0031665,GO:0032823,GO:0033082,GO:0035904,GO:0042127,GO:0042462,GO:0042826,GO:0043565,GO:0045087,GO:0045165,GO:0045579,GO:0046872,GO:0048844,GO:0051136,GO:0060576,GO:…	negative regulation of transcription by RNA polymerase II|RNA polymerase II regulatory region sequence-specific DNA binding|RNA polymerase II proximal promoter sequence-specific DNA binding|proximal promoter DNA-binding transcription repressor activity, RNA polymerase II-specific|in utero embryonic development|morphogenesis of a branching structure|embryonic placenta development|maternal placenta…
LOC100167163	0.618878	-0.692272	2.86e-11	5.23e-09	Down	Polyprenol reductase	GO:0003865,GO:0005783,GO:0005789,GO:0006488,GO:0016021,GO:0016095,GO:0019348,GO:0019408,GO:0102389	3-oxo-5-alpha-steroid 4-dehydrogenase activity|endoplasmic reticulum|endoplasmic reticulum membrane|dolichol-linked oligosaccharide biosynthetic process|integral component of membrane|polyprenol catabolic process|dolichol metabolic process|dolichol biosynthetic process|polyprenol reductase activity	ko00140	Steroid hormone biosynthesis
LOC100169255	0.618415	-0.693353	0.00107105	0.0245049	Down	Sodium/hydrogen exchanger 9B2	GO:0005451,GO:0005743,GO:0005886,GO:0006814,GO:0010008,GO:0010348,GO:0015385,GO:0016021,GO:0016323,GO:0016324,GO:0030054,GO:0030317,GO:0030672,GO:0031966,GO:0034220,GO:0042802,GO:0061178,GO:0072583,GO:0097228,GO:2001206	monovalent cation:proton antiporter activity|mitochondrial inner membrane|plasma membrane|sodium ion transport|endosome membrane|lithium:proton antiporter activity|sodium:proton antiporter activity|integral component of membrane|basolateral plasma membrane|apical plasma membrane|cell junction|flagellated sperm motility|synaptic vesicle membrane|mitochondrial membrane|ion transmembrane transport|i…
cp47	0.618401	-0.693386	6.46e-07	4.65e-05	Down	Cuticle protein 19	GO:0042302	structural constituent of cuticle
LOC100163758	0.616959	-0.696753	4.87e-15	1.43e-12	Down	Retinol dehydrogenase 11	GO:0001523,GO:0001917,GO:0004745,GO:0005622,GO:0005789,GO:0016021,GO:0016062,GO:0016616,GO:0042572,GO:0042574,GO:0052650	retinoid metabolic process|photoreceptor inner segment|retinol dehydrogenase activity|intracellular|endoplasmic reticulum membrane|integral component of membrane|adaptation of rhodopsin mediated signaling|oxidoreductase activity, acting on the CH-OH group of donors, NAD or NADP as acceptor|retinol metabolic process|retinal metabolic process|NADP-retinol dehydrogenase activity
LOC100169041	0.616588	-0.697622	0.0168446	0.212795	Down	Modular serine protease	GO:0004252,GO:0005576,GO:0006508,GO:0008592,GO:0045087,GO:0050830	serine-type endopeptidase activity|extracellular region|proteolysis|regulation of Toll signaling pathway|innate immune response|defense response to Gram-positive bacterium
LOC100169357	0.615529	-0.700101	2.17e-10	3.45e-08	Down
LOC100574754	0.615003	-0.701335	0.0461235	0.414702	Down	Knirps-related protein	GO:0001078,GO:0005634,GO:0007088,GO:0007427,GO:0008270,GO:0043565,GO:0045892,GO:0070491	proximal promoter DNA-binding transcription repressor activity, RNA polymerase II-specific|nucleus|regulation of mitotic nuclear division|epithelial cell migration, open tracheal system|zinc ion binding|sequence-specific DNA binding|negative regulation of transcription, DNA-templated|repressing transcription factor binding
LOC100164245	0.613257	-0.705435	0.000285	0.00829898	Down	Gastric triacylglycerol lipase	GO:0004806,GO:0005576,GO:0005739,GO:0006108,GO:0016042,GO:0016298,GO:0016615,GO:0043231,GO:0044255	triglyceride lipase activity|extracellular region|mitochondrion|malate metabolic process|lipid catabolic process|lipase activity|malate dehydrogenase activity|intracellular membrane-bounded organelle|cellular lipid metabolic process
LOC100162790	0.613222	-0.705518	1.51e-18	6.59e-16	Down	Serine proteinase stubble	GO:0004252,GO:0005886,GO:0006508,GO:0007010,GO:0016021,GO:0035220,GO:0051017	serine-type endopeptidase activity|plasma membrane|proteolysis|cytoskeleton organization|integral component of membrane|wing disc development|actin filament bundle assembly
LOC100572425	0.613167	-0.705647	3.94e-07	2.96e-05	Down	Glucose dehydrogenase [FAD, quinone]	GO:0005576,GO:0016614,GO:0050660	extracellular region|oxidoreductase activity, acting on CH-OH group of donors|flavin adenine dinucleotide binding
LOC115033200	0.612409	-0.707432	0.0447888	0.40734	Down	DDB1- and CUL4-associated factor 12	GO:0016567,GO:0080008	protein ubiquitination|Cul4-RING E3 ubiquitin ligase complex
LOC100168252	0.610886	-0.711025	4.1e-11	7.3e-09	Down
LOC100166601	0.609426	-0.714476	0.00982414	0.140621	Down
LOC100160987	0.608175	-0.717442	7.38e-15	2.09e-12	Down
LOC100572725	0.607109	-0.719973	4.25e-30	7.65e-27	Down
LOC100168127	0.606706	-0.720931	0.0430417	0.396423	Down
LOC100169359	0.605612	-0.723535	0.0031938	0.0581016	Down
LOC100168981	0.603724	-0.728039	0.00263926	0.0503872	Down	Translocation protein SEC62	GO:0005783,GO:0005789,GO:0005791,GO:0005829,GO:0006613,GO:0006620,GO:0016020,GO:0016021,GO:0030176,GO:0038023	endoplasmic reticulum|endoplasmic reticulum membrane|rough endoplasmic reticulum|cytosol|cotranslational protein targeting to membrane|posttranslational protein targeting to endoplasmic reticulum membrane|membrane|integral component of membrane|integral component of endoplasmic reticulum membrane|signaling receptor activity	ko04141,ko03060	Protein processing in endoplasmic reticulum|Protein export
LOC100570538	0.602154	-0.731795	9.1e-07	6.28e-05	Down	Probable G-protein coupled receptor Mth-like 1	GO:0004930,GO:0005886,GO:0007166,GO:0007186,GO:0007369,GO:0007472,GO:0007476,GO:0007509,GO:0008340,GO:0016021,GO:0042594,GO:0043519,GO:0048383,GO:0070252	G protein-coupled receptor activity|plasma membrane|cell surface receptor signaling pathway|G protein-coupled receptor signaling pathway|gastrulation|wing disc morphogenesis|imaginal disc-derived wing morphogenesis|mesoderm migration involved in gastrulation|determination of adult lifespan|integral component of membrane|response to starvation|regulation of myosin II filament organization|mesectod…
LOC100163469	0.600907	-0.734787	3.77e-30	7.65e-27	Down
LOC100160092	0.596003	-0.746608	1.4e-16	5.05e-14	Down	Sushi, von Willebrand factor type A, EGF and pentraxin domain-containing protein 1	GO:0003682,GO:0005509,GO:0005576,GO:0005615,GO:0005737,GO:0007155,GO:0016020	chromatin binding|calcium ion binding|extracellular region|extracellular space|cytoplasm|cell adhesion|membrane
LOC100575455	0.59442	-0.750446	0.00174139	0.0366429	Down
LOC100169582	0.589435	-0.762594	1.49e-13	3.69e-11	Down	Glucose dehydrogenase [FAD, quinone]	GO:0005576,GO:0006006,GO:0008364,GO:0016614,GO:0046693,GO:0050660	extracellular region|glucose metabolic process|pupal chitin-based cuticle development|oxidoreductase activity, acting on CH-OH group of donors|sperm storage|flavin adenine dinucleotide binding	ko00260	Glycine, serine and threonine metabolism
LOC100167412	0.586534	-0.769712	0.000628483	0.0157001	Down
LOC100163086	0.584275	-0.775281	7.43e-12	1.47e-09	Down	Glucose dehydrogenase [FAD, quinone]	GO:0005576,GO:0006006,GO:0008364,GO:0016614,GO:0046693,GO:0050660	extracellular region|glucose metabolic process|pupal chitin-based cuticle development|oxidoreductase activity, acting on CH-OH group of donors|sperm storage|flavin adenine dinucleotide binding
LOC100165402	0.582835	-0.77884	0.000779436	0.0189321	Down
LOC100164026	0.582578	-0.779477	2.22e-28	2.67e-25	Down	Nose resistant to fluoxetine protein 6	GO:0006869,GO:0007275,GO:0008289,GO:0016021,GO:0016747	lipid transport|multicellular organism development|lipid binding|integral component of membrane|transferase activity, transferring acyl groups other than amino-acyl groups
Obp5	0.575814	-0.796325	6.14e-21	3.54e-18	Down
LOC100158786	0.570463	-0.809794	4.94e-17	1.92e-14	Down	Serine proteinase stubble	GO:0004252,GO:0005886,GO:0006508,GO:0007010,GO:0016021,GO:0035220,GO:0051017	serine-type endopeptidase activity|plasma membrane|proteolysis|cytoskeleton organization|integral component of membrane|wing disc development|actin filament bundle assembly
LOC100571105	0.569363	-0.812579	0.0063279	0.100011	Down	Elongation of very long chain fatty acids protein 4			ko00062	Fatty acid elongation
LOC100165302	0.565982	-0.821173	3.62e-35	1.31e-31	Down
LOC100164941	0.565917	-0.821337	4.01e-13	9.64e-11	Down
LOC100161124	0.562566	-0.829904	8.34e-08	8.07e-06	Down	Agrin
LOC100167353	0.56069	-0.834726	7.34e-06	0.000383429	Down
LOC100573770	0.559684	-0.837315	1.19e-17	4.89e-15	Down
LOC100162944	0.559572	-0.837603	2.74e-05	0.00114844	Down
LOC100569447	0.557557	-0.84281	5.65e-16	1.89e-13	Down	Elongation of very long chain fatty acids protein AAEL008004	GO:0006633,GO:0030176,GO:0102336,GO:0102337,GO:0102338,GO:0102756	fatty acid biosynthetic process|integral component of endoplasmic reticulum membrane|3-oxo-arachidoyl-CoA synthase activity|3-oxo-cerotoyl-CoA synthase activity|3-oxo-lignoceronyl-CoA synthase activity|very-long-chain 3-ketoacyl-CoA synthase activity
LOC100569768	0.557193	-0.84375	1.63e-07	1.43e-05	Down	Ichor	GO:0000122,GO:0003677,GO:0005634,GO:0010628,GO:0035149,GO:0045944,GO:0046872,GO:0060439,GO:1901148	negative regulation of transcription by RNA polymerase II|DNA binding|nucleus|positive regulation of gene expression|lumen formation, open tracheal system|positive regulation of transcription by RNA polymerase II|metal ion binding|trachea morphogenesis|gene expression involved in extracellular matrix organization
LOC100571800	0.556864	-0.844603	1.65e-05	0.000749136	Down	Cuticle protein 8	GO:0042302	structural constituent of cuticle
LOC100168239	0.556746	-0.84491	2.04e-14	5.56e-12	Down	Atrial natriuretic peptide-converting enzyme	GO:0003050,GO:0004252,GO:0005044,GO:0005576,GO:0005887,GO:0007565,GO:0008217,GO:0016486,GO:0031410,GO:0035813	regulation of systemic arterial blood pressure by atrial natriuretic peptide|serine-type endopeptidase activity|scavenger receptor activity|extracellular region|integral component of plasma membrane|female pregnancy|regulation of blood pressure|peptide hormone processing|cytoplasmic vesicle|regulation of renal sodium excretion
LOC100167324	0.555136	-0.849088	4.07e-39	2.94e-35	Down
LOC107883725	0.550816	-0.860357	3.21e-07	2.49e-05	Down
LOC100161927	0.547892	-0.868036	1e-35	4.82e-32	Down
LOC100164343	0.547376	-0.869395	6.46e-06	0.000343547	Down	Protein masquerade	GO:0005615,GO:0005737,GO:0005886,GO:0006508,GO:0007417,GO:0007422,GO:0010976,GO:0016203,GO:0030424,GO:0043025,GO:0061564,GO:0106030	extracellular space|cytoplasm|plasma membrane|proteolysis|central nervous system development|peripheral nervous system development|positive regulation of neuron projection development|muscle attachment|axon|neuronal cell body|axon development|neuron projection fasciculation
LOC100574670	0.547217	-0.869816	1.68e-05	0.000755743	Down
LOC100166173	0.545429	-0.874537	2.88e-15	8.83e-13	Down				ko03020,ko00230,ko00240	RNA polymerase|Purine metabolism|Pyrimidine metabolism
LOC100161176	0.540421	-0.887844	9.13e-08	8.72e-06	Down
LOC100573121	0.539864	-0.889331	5.87e-11	1.02e-08	Down
LOC100576077	0.53724	-0.896362	0.0225745	0.261147	Down	Protein Wnt-7b	GO:0001701,GO:0003338,GO:0005109,GO:0005576,GO:0005615,GO:0005788,GO:0005796,GO:0005886,GO:0007257,GO:0016055,GO:0016332,GO:0021871,GO:0022009,GO:0030182,GO:0030324,GO:0030666,GO:0032364,GO:0032536,GO:0042592,GO:0044237,GO:0045165,GO:0045669,GO:0046330,GO:0048018,GO:0048144,GO:0048568,GO:0048812,GO:0050808,GO:0051384,GO:0060070,GO:0060425,GO:0060428,GO:0060482,GO:0060535,GO:0060560,GO:0060669,GO:…	in utero embryonic development|metanephros morphogenesis|frizzled binding|extracellular region|extracellular space|endoplasmic reticulum lumen|Golgi lumen|plasma membrane|activation of JUN kinase activity|Wnt signaling pathway|establishment or maintenance of polarity of embryonic epithelium|forebrain regionalization|central nervous system vasculogenesis|neuron differentiation|lung development|end…	ko04390,ko04916,ko04150,ko04310,ko04550	Hippo signaling pathway|Melanogenesis|mTOR signaling pathway|Wnt signaling pathway|Signaling pathways regulating pluripotency of stem cells
LOC100575819	0.533121	-0.907466	3.29e-07	2.54e-05	Down	Fatty acyl-CoA reductase wat	GO:0005737,GO:0005777,GO:0006629,GO:0010025,GO:0016021,GO:0016324,GO:0035002,GO:0035149,GO:0035336,GO:0045177,GO:0050062,GO:0055114,GO:0080019	cytoplasm|peroxisome|lipid metabolic process|wax biosynthetic process|integral component of membrane|apical plasma membrane|liquid clearance, open tracheal system|lumen formation, open tracheal system|long-chain fatty-acyl-CoA metabolic process|apical part of cell|long-chain-fatty-acyl-CoA reductase activity|oxidation-reduction process|fatty-acyl-CoA reductase (alcohol-forming) activity	ko04212,ko00073,ko04146	Longevity regulating pathway - worm|Cutin, suberine and wax biosynthesis|Peroxisome
LOC100164176	0.530634	-0.914212	2.87e-19	1.33e-16	Down	Serine protease lint	GO:0004252,GO:0005886,GO:0006508,GO:0016021,GO:0035149,GO:0060439,GO:0098595	serine-type endopeptidase activity|plasma membrane|proteolysis|integral component of membrane|lumen formation, open tracheal system|trachea morphogenesis|perivitelline space
LOC100162364	0.528402	-0.920293	1.41e-12	3.22e-10	Down	Serine proteinase stubble	GO:0004252,GO:0005886,GO:0006508,GO:0007010,GO:0016021,GO:0035220,GO:0051017	serine-type endopeptidase activity|plasma membrane|proteolysis|cytoskeleton organization|integral component of membrane|wing disc development|actin filament bundle assembly
LOC100166797	0.528328	-0.920493	3.44e-17	1.38e-14	Down
LOC100162011	0.528113	-0.921081	0.031024	0.320329	Down
LOC100167204	0.527562	-0.922589	3.57e-44	5.15e-40	Down
LOC100575400	0.526194	-0.926334	0.0216585	0.254223	Down	Cilia- and flagella-associated protein 161
LOC100568956	0.524287	-0.931571	1.8e-14	4.99e-12	Down
LOC100161949	0.523547	-0.933608	3.1e-15	9.3e-13	Down	Transmembrane protease serine 9	GO:0004252,GO:0005887	serine-type endopeptidase activity|integral component of plasma membrane
LOC100165955	0.521757	-0.938549	4.42e-13	1.04e-10	Down	Phosphoglycerate mutase 2	GO:0004082,GO:0004619,GO:0006096,GO:0016787	bisphosphoglycerate mutase activity|phosphoglycerate mutase activity|glycolytic process|hydrolase activity	ko00260,ko00680,ko04922,ko01200,ko01230,ko00010	Glycine, serine and threonine metabolism|Methane metabolism|Glucagon signaling pathway|Carbon metabolism|Biosynthesis of amino acids|Glycolysis / Gluconeogenesis
LOC100163792	0.521367	-0.939628	9.53e-23	7.23e-20	Down	Delta-like protein 3	GO:0001501,GO:0001756,GO:0005112,GO:0005509,GO:0007219,GO:0007386,GO:0016021,GO:0048339,GO:0050768	skeletal system development|somitogenesis|Notch binding|calcium ion binding|Notch signaling pathway|compartment pattern specification|integral component of membrane|paraxial mesoderm development|negative regulation of neurogenesis
LOC100575108	0.518136	-0.948598	0.00267781	0.0510555	Down
LOC100159953	0.517362	-0.950753	0.000302899	0.00866623	Down
LOC100571139	0.516598	-0.952886	9.98e-13	2.32e-10	Down
LOC100574719	0.514049	-0.960022	0.012753	0.171795	Down	Probable cytochrome P450 6a14	GO:0004497,GO:0005506,GO:0005789,GO:0016705,GO:0020037,GO:0031090	monooxygenase activity|iron ion binding|endoplasmic reticulum membrane|oxidoreductase activity, acting on paired donors, with incorporation or reduction of molecular oxygen|heme binding|organelle membrane
LOC100575526	0.513351	-0.961983	0.00103382	0.0239188	Down
LOC100168142	0.512703	-0.963806	0.00103137	0.0239006	Down	Lipase member H-B	GO:0005576,GO:0016020,GO:0016042,GO:0052689	extracellular region|membrane|lipid catabolic process|carboxylic ester hydrolase activity
LOC100162717	0.511317	-0.967711	3.65e-10	5.36e-08	Down	Glucose dehydrogenase [FAD, quinone]	GO:0005576,GO:0006006,GO:0008364,GO:0016614,GO:0046693,GO:0050660	extracellular region|glucose metabolic process|pupal chitin-based cuticle development|oxidoreductase activity, acting on CH-OH group of donors|sperm storage|flavin adenine dinucleotide binding	ko00260	Glycine, serine and threonine metabolism
LOC100162974	0.510732	-0.969361	7.2e-27	7.42e-24	Down	Putative fatty acyl-CoA reductase CG5065	GO:0005777,GO:0005778,GO:0005779,GO:0008611,GO:0010025,GO:0035336,GO:0080019,GO:0102965	peroxisome|peroxisomal membrane|integral component of peroxisomal membrane|ether lipid biosynthetic process|wax biosynthetic process|long-chain fatty-acyl-CoA metabolic process|fatty-acyl-CoA reductase (alcohol-forming) activity|alcohol-forming fatty acyl-CoA reductase activity	ko04212,ko00073,ko04146	Longevity regulating pathway - worm|Cutin, suberine and wax biosynthesis|Peroxisome
LOC100161602	0.510281	-0.970638	3.31e-12	7.13e-10	Down
LOC100164731	0.504401	-0.987357	9.74e-28	1.08e-24	Down	Proton channel OtopLc	GO:0005886,GO:0015252,GO:0016021,GO:1902600	plasma membrane|proton channel activity|integral component of membrane|proton transmembrane transport
LOC100167400	0.504016	-0.988459	4.39e-08	4.56e-06	Down
LOC100164777	0.494839	-1.01497	2.93e-10	4.47e-08	Down	Fatty acid synthase	GO:0004312,GO:0004313,GO:0004314,GO:0004315,GO:0004316,GO:0004320,GO:0005737,GO:0005794,GO:0005829,GO:0005886,GO:0006084,GO:0006633,GO:0008144,GO:0008610,GO:0008611,GO:0016295,GO:0016296,GO:0030223,GO:0030224,GO:0030879,GO:0031177,GO:0042470,GO:0042587,GO:0042802,GO:0042803,GO:0043170,GO:0047117,GO:0047451,GO:0070402,GO:0071353,GO:0090557,GO:0102131,GO:0102132	fatty acid synthase activity|[acyl-carrier-protein] S-acetyltransferase activity|[acyl-carrier-protein] S-malonyltransferase activity|3-oxoacyl-[acyl-carrier-protein] synthase activity|3-oxoacyl-[acyl-carrier-protein] reductase (NADPH) activity|oleoyl-[acyl-carrier-protein] hydrolase activity|cytoplasm|Golgi apparatus|cytosol|plasma membrane|acetyl-CoA metabolic process|fatty acid biosynthetic pr…	ko00061,ko04910,ko01212,ko04152	Fatty acid biosynthesis|Insulin signaling pathway|Fatty acid metabolism|AMPK signaling pathway
LOC100570295	0.494725	-1.0153	2.06e-10	3.37e-08	Down
LOC100168171	0.49463	-1.01558	4.67e-10	6.74e-08	Down	Antitrypsin	GO:0004867,GO:0005615	serine-type endopeptidase inhibitor activity|extracellular space
LOC100167881	0.493196	-1.01977	1.14e-19	5.67e-17	Down
LOC100158974	0.492607	-1.02149	5.55e-12	1.13e-09	Down
LOC100165242	0.492427	-1.02202	5.57e-07	4.1e-05	Down
LOC100568798	0.489688	-1.03006	0.00895797	0.130821	Down
LOC100161103	0.486159	-1.0405	0.00207774	0.0422754	Down	60S ribosomal protein L4-B	GO:0003735,GO:0005840,GO:0006412	structural constituent of ribosome|ribosome|translation	ko03010	Ribosome
LOC100159444	0.48169	-1.05382	2.9e-06	0.000167984	Down
LOC100163324	0.481646	-1.05395	3.83e-26	3.45e-23	Down
LOC100569251	0.480718	-1.05674	4.25e-14	1.09e-11	Down
LOC100166829	0.477469	-1.06652	3.94e-21	2.36e-18	Down
LOC100159700	0.476867	-1.06834	9.7e-31	2.33e-27	Down
LOC100166788	0.475396	-1.0728	5.82e-22	3.99e-19	Down	Fatty acyl-CoA reductase wat	GO:0005737,GO:0005777,GO:0006629,GO:0010025,GO:0016021,GO:0016324,GO:0035002,GO:0035149,GO:0035336,GO:0045177,GO:0050062,GO:0055114,GO:0080019	cytoplasm|peroxisome|lipid metabolic process|wax biosynthetic process|integral component of membrane|apical plasma membrane|liquid clearance, open tracheal system|lumen formation, open tracheal system|long-chain fatty-acyl-CoA metabolic process|apical part of cell|long-chain-fatty-acyl-CoA reductase activity|oxidation-reduction process|fatty-acyl-CoA reductase (alcohol-forming) activity	ko04212,ko00073,ko04146	Longevity regulating pathway - worm|Cutin, suberine and wax biosynthesis|Peroxisome
LOC100164798	0.475191	-1.07342	9.6e-11	1.65e-08	Down	Glucose dehydrogenase [FAD, quinone]	GO:0005576,GO:0006006,GO:0008364,GO:0016614,GO:0046693,GO:0050660	extracellular region|glucose metabolic process|pupal chitin-based cuticle development|oxidoreductase activity, acting on CH-OH group of donors|sperm storage|flavin adenine dinucleotide binding	ko00030	Pentose phosphate pathway
LOC100570590	0.474806	-1.07459	3.36e-14	8.81e-12	Down	Fatty acid synthase	GO:0003697,GO:0004312,GO:0004313,GO:0004314,GO:0004315,GO:0004316,GO:0004320,GO:0005623,GO:0006089,GO:0006633,GO:0016295,GO:0016296,GO:0031177,GO:0032100,GO:0047117,GO:0047451,GO:0102131,GO:0102132	single-stranded DNA binding|fatty acid synthase activity|[acyl-carrier-protein] S-acetyltransferase activity|[acyl-carrier-protein] S-malonyltransferase activity|3-oxoacyl-[acyl-carrier-protein] synthase activity|3-oxoacyl-[acyl-carrier-protein] reductase (NADPH) activity|oleoyl-[acyl-carrier-protein] hydrolase activity|cell|lactate metabolic process|fatty acid biosynthetic process|myristoyl-[acy…
LOC107884415	0.474171	-1.07652	0.000128004	0.00417431	Down	Glucose dehydrogenase [FAD, quinone]	GO:0005576,GO:0016614,GO:0050660	extracellular region|oxidoreductase activity, acting on CH-OH group of donors|flavin adenine dinucleotide binding
LOC100158728	0.473661	-1.07807	1.64e-10	2.71e-08	Down
LOC100160620	0.469656	-1.09032	3.63e-25	3.08e-22	Down
LOC100162010	0.466946	-1.09867	9.28e-05	0.00316078	Down
LOC100168386	0.466818	-1.09907	1.18e-28	1.55e-25	Down	Zinc metalloproteinase nas-14	GO:0004222,GO:0005576,GO:0008270	metalloendopeptidase activity|extracellular region|zinc ion binding
LOC100159213	0.466613	-1.0997	4.86e-12	1.02e-09	Down	Nose resistant to fluoxetine protein 6	GO:0006869,GO:0007275,GO:0008289,GO:0016021,GO:0016747	lipid transport|multicellular organism development|lipid binding|integral component of membrane|transferase activity, transferring acyl groups other than amino-acyl groups
LOC100166202	0.460207	-1.11965	2.22e-09	2.93e-07	Down
LOC100159048	0.459145	-1.12298	0.000231139	0.00692647	Down	Phenoloxidase-activating factor 2	GO:0004252,GO:0005576,GO:0045087,GO:0046872	serine-type endopeptidase activity|extracellular region|innate immune response|metal ion binding
LOC100166780	0.45536	-1.13492	1.31e-26	1.26e-23	Down
LOC100168401	0.454467	-1.13775	1.62e-20	8.34e-18	Down	Cuticlin-1	GO:0042302,GO:0060102	structural constituent of cuticle|collagen and cuticulin-based cuticle extracellular matrix
LOC100165921	0.452637	-1.14357	4.55e-14	1.15e-11	Down	Chitin-binding domain protein cbd-1	GO:0005576,GO:0006030,GO:0007275,GO:0008061,GO:0030703,GO:0071944,GO:1903078,GO:1904778	extracellular region|chitin metabolic process|multicellular organism development|chitin binding|eggshell formation|cell periphery|positive regulation of protein localization to plasma membrane|positive regulation of protein localization to cell cortex
LOC100161131	0.451271	-1.14793	0.00133881	0.0291945	Down	Probable tRNA (guanine(26)-N(2))-dimethyltransferase	GO:0000049,GO:0002940,GO:0004809,GO:0005634,GO:0005739	tRNA binding|tRNA N2-guanine methylation|tRNA (guanine-N2-)-methyltransferase activity|nucleus|mitochondrion
LOC103307627	0.449214	-1.15452	1e-32	2.88e-29	Down
LOC107884418	0.445234	-1.16736	1.6e-12	3.6e-10	Down	Glucose dehydrogenase [FAD, quinone]	GO:0005576,GO:0006006,GO:0008364,GO:0016614,GO:0046693,GO:0050660	extracellular region|glucose metabolic process|pupal chitin-based cuticle development|oxidoreductase activity, acting on CH-OH group of donors|sperm storage|flavin adenine dinucleotide binding
LOC100159162	0.440612	-1.18242	3.9e-12	8.27e-10	Down
LOC100163560	0.437687	-1.19203	5.5e-30	8.21e-27	Down
LOC100168232	0.435297	-1.19993	2.83e-12	6.19e-10	Down	Apolipoprotein D	GO:0000302,GO:0001525,GO:0005319,GO:0005576,GO:0005615,GO:0005783,GO:0006006,GO:0006629,GO:0007420,GO:0007568,GO:0010642,GO:0014012,GO:0015485,GO:0022626,GO:0030425,GO:0042246,GO:0042308,GO:0042493,GO:0043025,GO:0048471,GO:0048662,GO:0048678,GO:0051895,GO:0060588,GO:0070062,GO:0071638,GO:1900016,GO:2000098,GO:2000405	response to reactive oxygen species|angiogenesis|lipid transporter activity|extracellular region|extracellular space|endoplasmic reticulum|glucose metabolic process|lipid metabolic process|brain development|aging|negative regulation of platelet-derived growth factor receptor signaling pathway|peripheral nervous system axon regeneration|cholesterol binding|cytosolic ribosome|dendrite|tissue regene…
LOC100166868	0.434074	-1.20399	2.59e-07	2.08e-05	Down
LOC100168836	0.433093	-1.20725	1.28e-08	1.52e-06	Down
LOC100159472	0.432603	-1.20888	1.45e-20	7.84e-18	Down
LOC100168276	0.430556	-1.21573	0.0010261	0.0238551	Down
LOC100162252	0.42953	-1.21917	1.17e-06	7.85e-05	Down	Neurotrophin 1	GO:0005121,GO:0005576,GO:0007399,GO:0007411,GO:0008045,GO:0008063,GO:0008083,GO:0008592,GO:0010941,GO:0021556,GO:0031637,GO:0045087	Toll binding|extracellular region|nervous system development|axon guidance|motor neuron axon guidance|Toll signaling pathway|growth factor activity|regulation of Toll signaling pathway|regulation of cell death|central nervous system formation|regulation of neuronal synaptic plasticity in response to neurotrophin|innate immune response
LOC100572968	0.424287	-1.23689	0.00973773	0.1398	Down
LOC100158963	0.41619	-1.26469	1.14e-06	7.69e-05	Down	Sclerostin domain-containing protein 1	GO:0005615,GO:0007389,GO:0007566,GO:0010454,GO:0016055,GO:0030514,GO:0031069,GO:0036122,GO:0042475,GO:0045662,GO:0060648,GO:0090090,GO:0098821,GO:2000016	extracellular space|pattern specification process|embryo implantation|negative regulation of cell fate commitment|Wnt signaling pathway|negative regulation of BMP signaling pathway|hair follicle morphogenesis|BMP binding|odontogenesis of dentin-containing tooth|negative regulation of myoblast differentiation|mammary gland bud morphogenesis|negative regulation of canonical Wnt signaling pathway|BM…
LOC100574233	0.415335	-1.26765	0.0260397	0.286735	Down	DNA-directed RNA polymerase II subunit RPB9	GO:0000278,GO:0001193,GO:0003676,GO:0003899,GO:0005634,GO:0005665,GO:0005730,GO:0006283,GO:0006366,GO:0006367,GO:0006379,GO:0008270	mitotic cell cycle|maintenance of transcriptional fidelity during DNA-templated transcription elongation from RNA polymerase II promoter|nucleic acid binding|DNA-directed 5'-3' RNA polymerase activity|nucleus|RNA polymerase II, core complex|nucleolus|transcription-coupled nucleotide-excision repair|transcription by RNA polymerase II|transcription initiation from RNA polymerase II promoter|mRNA cl…	ko00230,ko00240,ko03020	Purine metabolism|Pyrimidine metabolism|RNA polymerase
LOC100166606	0.41478	-1.26958	0.000344517	0.00969896	Down
LOC100159110	0.414613	-1.27016	9.46e-22	5.93e-19	Down
LOC100167585	0.412723	-1.27675	6.36e-08	6.36e-06	Down	Phenoloxidase-activating factor 2	GO:0004252,GO:0005576,GO:0045087,GO:0046872	serine-type endopeptidase activity|extracellular region|innate immune response|metal ion binding
LOC100161508	0.409736	-1.28723	1.22e-19	5.86e-17	Down
LOC100164166	0.403555	-1.30916	0.00703839	0.108737	Down
LOC100158720	0.386078	-1.37304	0.000421157	0.0114539	Down	Glucose dehydrogenase [FAD, quinone]	GO:0005576,GO:0016614,GO:0050660	extracellular region|oxidoreductase activity, acting on CH-OH group of donors|flavin adenine dinucleotide binding
LOC100572531	0.38382	-1.3815	0.0427654	0.394636	Down	Transmembrane protease serine 2	GO:0004252,GO:0005044,GO:0005576,GO:0005886,GO:0006508,GO:0016021,GO:0016540,GO:0046598	serine-type endopeptidase activity|scavenger receptor activity|extracellular region|plasma membrane|proteolysis|integral component of membrane|protein autoprocessing|positive regulation of viral entry into host cell
LOC100168188	0.380984	-1.3922	1.35e-16	5e-14	Down
LOC100167687	0.37837	-1.40213	1.48e-11	2.81e-09	Down
LOC100159210	0.371223	-1.42964	1.5e-08	1.77e-06	Down
LOC100162624	0.364098	-1.4576	0.0163158	0.207936	Down	Ring canal kelch homolog	GO:0003779,GO:0005737,GO:0005856	actin binding|cytoplasm|cytoskeleton
LOC100570421	0.36041	-1.47229	0.043548	0.399809	Down	Ring canal kelch homolog	GO:0003779,GO:0005737,GO:0005856	actin binding|cytoplasm|cytoskeleton
LOC100159968	0.354246	-1.49718	8.79e-06	0.000447954	Down
LOC100169340	0.354139	-1.49761	0.00407049	0.0703502	Down
LOC100572394	0.353098	-1.50186	0.000484465	0.0128602	Down
LOC100569007	0.33514	-1.57716	0.0202657	0.242616	Down
LOC100159668	0.329138	-1.60324	7.56e-05	0.00262055	Down
LOC100164760	0.303561	-1.71994	0.000142706	0.00458122	Down
LOC107883010	0.296207	-1.75532	0.00371417	0.0652879	Down
LOC100570242	0.294836	-1.76202	1.96e-06	0.00011785	Down
LOC115034112	0.259655	-1.94533	0.0299162	0.312473	Down	DNA-directed RNA polymerase II subunit RPB9	GO:0000278,GO:0001193,GO:0003676,GO:0003899,GO:0005634,GO:0005665,GO:0005730,GO:0006283,GO:0006366,GO:0006367,GO:0006379,GO:0008270	mitotic cell cycle|maintenance of transcriptional fidelity during DNA-templated transcription elongation from RNA polymerase II promoter|nucleic acid binding|DNA-directed 5'-3' RNA polymerase activity|nucleus|RNA polymerase II, core complex|nucleolus|transcription-coupled nucleotide-excision repair|transcription by RNA polymerase II|transcription initiation from RNA polymerase II promoter|mRNA cl…	ko00230,ko00240,ko03020	Purine metabolism|Pyrimidine metabolism|RNA polymerase
