# Supplementary material for: A novel gene REPTOR2 activates the autophagic degradation of wing disc in pea aphid
Source: eLife. 2023 Mar 21;12:e83023. doi: 10.7554/eLife.83023 (PMC10030113; doi:10.7554/eLife.83023)
Supplement: Figure 3—source data 2. [file elife-83023-fig3-data2.xlsx]

## Sheet: Sheet1
Figure 3 - Source Data 2
Figure 3B: Transcript mapping to TOR signaling pathway of pea aphids and DEGs in two wing morphs winged-destined aphids at 24 h post birth
		Gene_id	FoldChange	log2FoldChange	p-value	q-value	description	WD-1	WD-2	WD-3	WLD-1	WLD-2	WLD-3
GO:0038202	TORC1 signaling	LOC100159297	0.990161	-0.0142644	0.924826	1	REPTOR-binding partner	1.06699	0.964477	0.968536	0.963008	1.08617	0.915245
		LOC100159893	0.943056	-0.084584	0.342261	1	GATOR complex protein NPRL3	1.00278	1.01416	0.983059	0.899034	0.987453	0.936687
		LOC103309809	1.94325	0.958471	0.0384203	0.368212	Protein CREBRF homolog	0.49073	1.49172	1.01755	1.43758	2.26873	2.12336
		LOC100163481	0.994498	-0.00796011	0.914359	1	Serine/threonine-protein kinase mTOR	1.03463	0.973071	0.992296	0.939503	1.06787	0.969944
		LOC100167375	1.04496	0.0634479	0.328795	1	Regulatory-associated protein of mTOR	0.995891	0.98857	1.01554	1.06217	1.07318	0.991757
		LOC100168197	1.1276	0.173252	0.0463027	0.415313	Protein CREBRF homolog	1.10389	1.0022	0.893903	1.08465	1.16722	1.1237
GO:0031929	TOR signaling	LOC100162508	1.04626	0.0652425	0.285126	1	Ribosomal protein S6 kinase beta-1	1.07219	0.985648	0.942164	1.02149	1.05609	1.05376
		LOC100162822	0.986782	-0.0191965	0.820051	1	Rapamycin-insensitive companion of mTOR	0.963503	1.02984	1.00665	0.944833	1.02243	0.986655
		LOC100163481	0.994498	-0.00796011	0.914359	1	Serine/threonine-protein kinase mTOR	1.03463	0.973071	0.992296	0.939503	1.06787	0.969944
		LOC100167375	1.04496	0.0634479	0.328795	1	Regulatory-associated protein of mTOR	0.995891	0.98857	1.01554	1.06217	1.07318	0.991757
		Mlst8	0.975904	-0.0351895	0.725113	1	Target of rapamycin complex subunit lst8	0.965601	1.00701	1.02739	0.98372	0.983205	0.953427
GO:0032006	regulation of TOR signaling	LOC100159139	0.901628	-0.149395	0.439275	1	High affinity cationic amino acid transporter 1	0.898083	1.20981	0.892105	0.959285	0.798641	0.939759
		LOC100159188	1.12571	0.170836	0.169774	0.841695	High affinity cationic amino acid transporter 1	0.937581	0.938217	1.1242	1.2283	1.13076	1.00792
		LOC100162339	1.06854	0.0956466	0.218918	0.931095	Proto-oncogene tyrosine-protein kinase ROS	1.04898	0.959779	0.99124	1.07783	1.07105	1.04843
		LOC100162798	1.06339	0.0886712	0.550235	1	High affinity cationic amino acid transporter 1	0.838425	0.995128	1.16645	1.12559	0.97845	1.07588
		LOC100164454	1.20474	0.268726	0.00623548	0.0988759	High affinity cationic amino acid transporter 1	1.02635	0.953152	1.0205	1.20577	1.17817	1.22044
		LOC100164474	0.910199	-0.135746	0.118448	0.713757	TELO2-interacting protein 1 homolog	1.01167	0.96576	1.02257	0.92407	0.894055	0.905026
		LOC100165808	0.976529	-0.0342658	0.821535	1	Proto-oncogene tyrosine-protein kinase ROS	0.980755	0.927572	1.09167	1.05758	1.05221	0.812037
		LOC100166140	1.01175	0.0168491	0.799406	1	CAAX prenyl protease 1 homolog	0.93686	1.03947	1.02367	1.00067	1.06381	0.964115
		LOC100166210	1.07737	0.107511	0.15347	0.805485	F-box only protein 9	0.987805	0.997533	1.01466	1.02393	1.05292	1.14722
		LOC100166642	0.970071	-0.0438376	0.671733	1	Ras-related GTP-binding protein C	1.00519	1.02144	0.97337	0.885506	1.06481	0.954799
		LOC100166939	1.20733	0.271822	0.0441164	0.403486	Protein charybde	1.16471	1.01346	0.821829	1.20897	1.17934	1.22496
		LOC100168178	0.878515	-0.186861	0.038955	0.372099	High affinity cationic amino acid transporter 1	0.894566	1.02914	1.07629	0.837867	0.922919	0.869046
		LOC100169217	0.945972	-0.08013	0.490391	1	Intraflagellar transport protein 57 homolog	0.948876	1.03367	1.01746	0.999549	0.947123	0.883818
		LOC100569120	2.45272	1.29438	0.616654	1	Proto-oncogene tyrosine-protein kinase ROS	0	1.53454	1.46546	4.43653	1.42061	1.45621
		LOC100571880	1.77771	0.830022	0.3818	1	CAAX prenyl protease 1 homolog	1.0199	0.922703	1.0574	0.533528	3.41678	1.40097
GO:0032007	negative regulation of TOR signaling	Atpsyn-d	0.989438	-0.0153188	0.774848	1	ATP synthase subunit d, mitochondrial	1.00129	0.973657	1.02505	0.971554	0.993789	0.995498
		cyc	1.04505	0.0635663	0.598789	1	Aryl hydrocarbon receptor nuclear translocator-like protein 1	1.06099	0.887436	1.05157	1.05769	1.09651	0.972753
		LOC100159709	1.0633	0.0885457	0.149482	0.796832	E3 ubiquitin-protein ligase UBR2	1.05581	0.958427	0.985763	1.03116	1.09738	1.05385
		LOC100159893	0.943056	-0.084584	0.342261	1	GATOR complex protein NPRL3	1.00278	1.01416	0.983059	0.899034	0.987453	0.936687
		LOC100160946	0.880826	-0.183071	0.0994616	0.649315	GATOR complex protein NPRL2	1.01848	0.990381	0.991143	0.947897	0.788113	0.897985
		LOC100162494	1.10857	0.148702	0.116988	0.70883	Serine/threonine-protein kinase NIM1	0.983599	1.07033	0.946076	1.14182	1.1729	1.00388
		LOC100162724	1.01001	0.0143699	1	1	Serine/threonine-protein kinase NIM1	1.45546	0.790054	0.754487	0.761378	0	2.24917
		LOC100163108	0.951167	-0.0722292	0.376288	1	Programmed cell death protein 6	0.939596	0.970985	1.08942	0.91401	0.952924	0.979324
		LOC100164510	0.902232	-0.14843	0.114058	0.698565	Programmed cell death protein 6	0.89471	1.05453	1.05076	0.837861	0.94254	0.920765
		LOC100166236	1.02827	0.0402126	0.668398	1	GATOR complex protein DEPDC5	0.9942	0.970986	1.03481	0.976694	1.05035	1.05046
		LOC100167523	1.0254	0.0361838	0.582945	1	Serine/threonine-protein kinase SIK2	0.99535	1.05084	0.953809	1.02443	1.0229	1.02158
		LOC100573780	1.01783	0.0255003	0.748258	1	Aryl hydrocarbon receptor nuclear translocator-like protein 1	1.03902	1.0014	0.959586	1.00682	1.0263	1.01306
		LOC103309639	1.08038	0.111542	0.155115	0.808616	5'-AMP-activated protein kinase catalytic subunit alpha-2	1.02557	1.02516	0.949268	1.05423	1.0884	1.09105
GO:0032008	positive regulation of TOR signaling	LOC100158916	1.52898	0.61257	1.25e-16	4.75e-14	Sodium-coupled neutral amino acid transporter 9	1.00662	1.07166	0.921725	1.53504	1.45499	1.58541
		LOC100160010	1.01245	0.0178448	0.847062	1	Ragulator complex protein LAMTOR4 homolog	0.945919	0.998084	1.056	1.03414	1.00231	0.992759
		LOC100161510	0.961422	-0.0567583	0.590373	1	Ragulator complex protein LAMTOR2	0.996409	0.996662	1.00693	0.960487	0.886094	1.02941
		LOC100162822	0.986782	-0.0191965	0.820051	1	Rapamycin-insensitive companion of mTOR	0.963503	1.02984	1.00665	0.944833	1.02243	0.986655
		LOC100163114	0.973546	-0.0386783	0.698307	1	GATOR complex protein WDR24	0.990571	1.00262	1.00681	0.977539	0.991213	0.944753
		LOC100165343	1.0037	0.00532747	0.976046	1	Ragulator complex protein LAMTOR3	0.983887	0.955097	1.06102	1.05943	1.0935	0.850853
		LOC100166628	0.948823	-0.0757892	0.48925	1	GATOR complex protein WDR59	0.951335	1.05978	0.98889	0.865385	1.00855	0.967294
		LOC100166642	0.970071	-0.0438376	0.671733	1	Ras-related GTP-binding protein C	1.00519	1.02144	0.97337	0.885506	1.06481	0.954799
		LOC100167375	1.04496	0.0634479	0.328795	1	Regulatory-associated protein of mTOR	0.995891	0.98857	1.01554	1.06217	1.07318	0.991757
		LOC100168532	0.995631	-0.00631679	0.980701	1	Ras-related GTP-binding protein A	1.01763	1.0868	0.895566	0.918601	0.98946	1.07277
		Mlst8	0.975904	-0.0351895	0.725113	1	Target of rapamycin complex subunit lst8	0.965601	1.00701	1.02739	0.98372	0.983205	0.953427
