# Supplementary material for: A novel gene REPTOR2 activates the autophagic degradation of wing disc in pea aphid
Source: eLife. 2023 Mar 21;12:e83023. doi: 10.7554/eLife.83023 (PMC10030113; doi:10.7554/eLife.83023)
Supplement: Figure 3—source data 3. [file elife-83023-fig3-data3.xlsx]

## Sheet: Sheet1
Figure 3 - Source Data 3
Figure 3H: Relative expression levels of REPTOR2 in 1st instar nymph at 12 h, 24 h and 36 h post birth in winged- and wingless-destined aphids post birth
Morph	Time	Replicate	REPTOR2
WD	12h	1	0.975805
		2	0.951756
		3	1.07244
		4	1.00031
	24h	1	0.916386
		2	0.865403
		3	0.833653
		4	0.659695
	36h	1	0.806571
		2	0.625036
		3	0.761769
		4	0.851121
WLD	12h	1	1.19172
		2	1.24446
		3	1.33206
		4	1.25608
	24h	1	1.13836
		2	1.08193
		3	1.30901
		4	0.881759
	36h	1	1.03448
		2	0.662938
		3	0.835299
		4	1.01
