# Supplementary material for: A novel gene REPTOR2 activates the autophagic degradation of wing disc in pea aphid
Source: eLife. 2023 Mar 21;12:e83023. doi: 10.7554/eLife.83023 (PMC10030113; doi:10.7554/eLife.83023)
Supplement: Figure 3—source data 4. [file elife-83023-fig3-data4.xlsx]

## Sheet: Sheet1
Figure 3 - Source Data 4
Figure 3I: Expression levels of REPTOR2 in head, thorax and abdomen of winged- and wingless-destined aphids at 24 h post birth
Morph	Tissue	Replicate	REPTOR2
WD	Head	1	1.74844
		2	0.752635
		3	0.837354
		4	0.661566
	Thorax	1	0.89395
		2	1.42441
		3	1.69612
		4	0.870243
	Abdomen	1	1.36661
		2	1.29979
		3	1.77819
		4	1.51636
WLD	Head	1	1.26459
		2	1.02025
		3	1.27168
		4	1.59959
	Thorax	1	2.93453
		2	2.91827
		3	3.39157
		4	3.29265
	Abdomen	1	1.42149
		2	1.5825
		3	0.961398
		4	1.17548
