# Supplementary material for: A novel gene REPTOR2 activates the autophagic degradation of wing disc in pea aphid
Source: eLife. 2023 Mar 21;12:e83023. doi: 10.7554/eLife.83023 (PMC10030113; doi:10.7554/eLife.83023)
Supplement: Figure 3—source data 5. [file elife-83023-fig3-data5.xlsx]

## Sheet: Sheet1
Figure 3 - Source Data 5
Figure 3J: Effects of dsREPTOR2 on the expression of genes related to autophagy in whole body of the 1st instar nymphs
Treatment	Replicate	ATG1a
dsGFP	1	0.821977
	2	1.20913
	3	0.992671
	4	0.976223
dsREPTOR2	1	1.03538
	2	1.23188
	3	1.03358
	4	1.21872
Treatment	Replicate	ATG1b
dsGFP	1	0.886213
	2	0.844306
	3	1.20844
	4	1.06104
dsREPTOR2	1	1.23452
	2	1.20763
	3	1.00003
	4	0.980056
Treatment	Replicate	ATG3a
dsGFP	1	0.768856
	2	1.1164
	3	1.04974
	4	1.06501
dsREPTOR2	1	1.06904
	2	1.2797
	3	1.13101
	4	1.25205
Treatment	Replicate	ATG3b
dsGFP	1	0.837315
	2	0.742982
	3	1.41424
	4	1.00546
dsREPTOR2	1	1.92438
	2	0.694411
	3	0.916933
	4	0.700598
Treatment	Replicate	ATG4
dsGFP	1	0.871911
	2	1.19455
	3	1.00325
	4	0.930298
dsREPTOR2	1	1.01509
	2	1.03452
	3	0.911521
	4	0.933584
Treatment	Replicate	ATG5
dsGFP	1	0.852986
	2	0.778887
	3	1.34726
	4	1.02087
dsREPTOR2	1	1.46947
	2	0.755956
	3	0.86773
	4	0.703966
Treatment	Replicate	ATG7
dsGFP	1	0.788045
	2	1.19064
	3	1.16569
	4	0.855621
dsREPTOR2	1	1.09242
	2	1.09701
	3	1.0676
	4	1.1373
Treatment	Replicate	ATG8
dsGFP	1	1.27667
	2	1.05968
	3	1.25011
	4	0.413538
dsREPTOR2	1	1.04313
	2	1.35742
	3	0.397477
	4	1.32271
Treatment	Replicate	ATG10
dsGFP	1	0.676563
	2	1.12585
	3	1.1207
	4	1.07688
dsREPTOR2	1	1.31461
	2	1.28051
	3	1.09209
	4	1.15167
Treatment	Replicate	ATG12
dsGFP	1	0.870953
	2	1.17941
	3	1.03198
	4	0.917653
dsREPTOR2	1	1.03136
	2	1.02064
	3	0.815955
	4	0.61683
Treatment	Replicate	ATG13
dsGFP	1	0.919506
	2	1.01353
	3	0.975318
	4	1.09164
dsREPTOR2	1	0.850595
	2	0.875584
	3	0.831814
	4	0.844387
Treatment	Replicate	ATG14
dsGFP	1	0.965934
	2	1.13869
	3	0.947379
	4	0.947999
dsREPTOR2	1	0.687971
	2	0.964906
	3	0.658052
	4	0.715669
Treatment	Replicate	ATG16
dsGFP	1	0.887384
	2	1.30206
	3	0.855931
	4	0.954622
dsREPTOR2	1	1.12134
	2	1.37281
	3	0.997863
	4	1.06383
