# Supplementary material for: A novel gene REPTOR2 activates the autophagic degradation of wing disc in pea aphid
Source: eLife. 2023 Mar 21;12:e83023. doi: 10.7554/eLife.83023 (PMC10030113; doi:10.7554/eLife.83023)
Supplement: Figure 3—source data 6. [file elife-83023-fig3-data6.xlsx]

## Sheet: Sheet1
Figure 3 - Source Data 6
Figure 3K: Knockdown of REPTOR2 reduced its expression in wing disc at 24 h post birth. Fluorescence in situ hybridization (FISH) was used to detect the REPTOR2 expression level in aphid wing discs
Treatment	Replicate	REPTOR2/DAPI
dsGFP	1	1.08162
	2	1.23156
	3	0.686823
dsREPTOR2	1	0.603913
	2	0.490967
	3	0.320555
