# Supplementary material for: A novel gene REPTOR2 activates the autophagic degradation of wing disc in pea aphid
Source: eLife. 2023 Mar 21;12:e83023. doi: 10.7554/eLife.83023 (PMC10030113; doi:10.7554/eLife.83023)
Supplement: Figure 3—source data 7. [file elife-83023-fig3-data7.xlsx]

## Sheet: Sheet1
Figure 3 - Source Data 7
Figure 3L: dsREPTOR2 feeding decreased the gene expression of REPTOR2, as determined by qPCR
Treatment	Replicate	REPTOR2
dsGFP	1	0.639506
	2	1.70029
	3	1.01412
	4	0.646082
dsREPTOR2	1	0.380564
	2	0.222726
	3	0.388038
	4	0.403048
