# Supplementary material for: A novel gene REPTOR2 activates the autophagic degradation of wing disc in pea aphid
Source: eLife. 2023 Mar 21;12:e83023. doi: 10.7554/eLife.83023 (PMC10030113; doi:10.7554/eLife.83023)
Supplement: Figure 3—source data 8. [file elife-83023-fig3-data8.xlsx]

## Sheet: Sheet1
Figure 3 - Source Data 8
Figure 3M: Knockdown of REPTOR2 resulted in the decline of autophagy in the wing disc at 30 h post birth. Autophagy was noted by ATG8 (red) in immunofluorescence, and nuclei were stained by DAPI (blue)
Treatment	Replicate	ATG8/DAPI
dsGFP	1	0.913051
	2	0.760554
	3	1.06699
	4	1.2594
dsREPTOR2	1	0.760554
	2	0.0741654
	3	0.379897
	4	0.160934
