# Supplementary material for: A novel gene REPTOR2 activates the autophagic degradation of wing disc in pea aphid
Source: eLife. 2023 Mar 21;12:e83023. doi: 10.7554/eLife.83023 (PMC10030113; doi:10.7554/eLife.83023)
Supplement: Figure 3—source data 9. [file elife-83023-fig3-data9.xlsx]

## Sheet: Sheet1
Figure 3 - Source Data 9
Figure 3N: dsREPTOR2 treatment increased the proportion of winged aphids
Treatment	Replicate	Winged%
dsGFP	1	26.3158
	2	50
	3	31.5789
	4	29.1667
	5	30
	6	35.2941
	7	38.0952
	8	44.4444
	9	42.1053
	10	61.1111
dsREPTOR2	1	57.1429
	2	33.3333
	3	56.25
	4	40
	5	60
	6	47.0588
	7	38.0952
	8	68.4211
	9	47.619
	10	60
