# Supplementary material for: A novel gene REPTOR2 activates the autophagic degradation of wing disc in pea aphid
Source: eLife. 2023 Mar 21;12:e83023. doi: 10.7554/eLife.83023 (PMC10030113; doi:10.7554/eLife.83023)
Supplement: Figure 4—source data 1. [file elife-83023-fig4-data1.xlsx]

## Sheet: Sheet1
Figure 4 - Source Data 1
Figure 4A: TOR expression in the wing disc of 1st instar nymph of winged- and wingless-destined aphids at 24 h post birth, as determined by mRNA-FISH
Morph	Replicate	TOR/DAPI
WD	1	0.967941
	2	0.927514
	3	1.15161
	4	1.13382
	5	1.12112
	6	0.931746
	7	0.710901
	8	1.02878
	9	1.02657
WLD	1	0.469783
	2	0.466208
	3	0.402328
	4	0.41176
	5	0.210007
	6	0.268964
	7	0.15974
	8	0.415415
	9	0.670702
