# Supplementary material for: A novel gene REPTOR2 activates the autophagic degradation of wing disc in pea aphid
Source: eLife. 2023 Mar 21;12:e83023. doi: 10.7554/eLife.83023 (PMC10030113; doi:10.7554/eLife.83023)
Supplement: Figure 4—source data 2. [file elife-83023-fig4-data2.xlsx]

## Sheet: Sheet1
Figure 4 - Source Data 2
Figure 4B: Newborn nymphs fed with dsRNA reduced TOR expression in whole body 24 h post birth, as determined by qPCR
Treatment	Replicate	TOR
dsGFP	1	0.696636
	2	1.05347
	3	1.2499
dsTOR	1	0.469266
	2	0.49717
	3	0.58041
