# Supplementary material for: A novel gene REPTOR2 activates the autophagic degradation of wing disc in pea aphid
Source: eLife. 2023 Mar 21;12:e83023. doi: 10.7554/eLife.83023 (PMC10030113; doi:10.7554/eLife.83023)
Supplement: Figure 4—source data 3. [file elife-83023-fig4-data3.xlsx]

## Sheet: Sheet1
Figure 4 - Source Data 3
Figure 4C: Knockdown of TOR reduced its expression in the wing disc 24 h post birth, shown in mRNA-FISH
Treatment	Replicate	TOR/DAPI
dsGFP	1	1.2757
	2	0.959062
	3	0.847145
	4	0.899426
	5	1.17238
	6	1.08214
	7	0.886028
	8	0.878114
dsTOR	1	0.813652
	2	0.840283
	3	0.719331
	4	0.590577
	5	0.57153
	6	0.402091
	7	0.702635
