# Supplementary material for: A novel gene REPTOR2 activates the autophagic degradation of wing disc in pea aphid
Source: eLife. 2023 Mar 21;12:e83023. doi: 10.7554/eLife.83023 (PMC10030113; doi:10.7554/eLife.83023)
Supplement: Figure 4—source data 4. [file elife-83023-fig4-data4.xlsx]

## Sheet: Sheet1
Figure 4 - Source Data 4
Figure 4D: Knockdown of TOR increased the proportion of winged aphids
Treatment	Replicate	Winged%
dsGFP	1	86.96
	2	84.21
	3	86.36
	4	31.25
	5	35.29
	6	52.63
	7	82.35
	8	85.71
	9	72.22
	10	70
dsTOR	1	44.44
	2	45
	3	57.89
	4	72.22
	5	50
	6	41.18
	7	73.68
	8	36.84
	9	47.06
	10	47.37
