# Supplementary material for: A novel gene REPTOR2 activates the autophagic degradation of wing disc in pea aphid
Source: eLife. 2023 Mar 21;12:e83023. doi: 10.7554/eLife.83023 (PMC10030113; doi:10.7554/eLife.83023)
Supplement: Figure 4—source data 5. [file elife-83023-fig4-data5.xlsx]

## Sheet: Sheet1
Figure 4 - Source Data 5
Figure 4E: Application of TOR agonist MHY1485 attenuated autophagy in the wing disc 30 h post birth
Treatment	Replicate	ATG8/DAPI
DMSO	1	1.02863
	2	0.804094
	3	0.837129
	4	0.885296
	5	1.21656
	6	1.14276
	7	0.968835
	8	1.04042
	9	1.07628
MHY1485	1	0.422325
	2	0.433784
	3	0.434342
	4	0.443546
	5	0.423509
	6	0.469125
	7	0.462642
	8	0.515708
	9	0.364086
