# Supplementary material for: A novel gene REPTOR2 activates the autophagic degradation of wing disc in pea aphid
Source: eLife. 2023 Mar 21;12:e83023. doi: 10.7554/eLife.83023 (PMC10030113; doi:10.7554/eLife.83023)
Supplement: Figure 4—source data 6. [file elife-83023-fig4-data6.xlsx]

## Sheet: Sheet1
Figure 4 - Source Data 6
Figure 4F: Application of TOR agonist MHY1485 increased the proportion of winged aphids
Treatment	Replicate	Winged%
DMSO	1	40
	2	25
	3	57.8947
	4	40
	5	26.3158
	6	14.2857
	7	52.9412
	8	42.1053
MHY1485	1	55.5556
	2	63.1579
	3	70
	4	68.4211
	5	11.1111
	6	52.6316
	7	58.8235
	8	52.381
	9	47.3684
	10	73.3333
