# Supplementary material for: A novel gene REPTOR2 activates the autophagic degradation of wing disc in pea aphid
Source: eLife. 2023 Mar 21;12:e83023. doi: 10.7554/eLife.83023 (PMC10030113; doi:10.7554/eLife.83023)
Supplement: Figure 4—source data 7. [file elife-83023-fig4-data7.xlsx]

## Sheet: Sheet1
Figure 4 - Source Data 7
Figure 4G: Amino acids supplied at 50% of the standard diet (50% AA) activated autophagy in the wing disc 30 h post birth
Treatment	Replicate	ATG8/DAPI
100%AA	1	1.00651
	2	1.34485
	3	1.24444
	4	1.18815
	5	1.02879
	6	0.843572
	7	0.601005
	8	0.742688
50%AA	1	1.92333
	2	2.09911
	3	1.88936
	4	2.74872
	5	1.97916
	6	2.00155
	7	2.53674
	8	1.76689
