# Supplementary material for: A novel gene REPTOR2 activates the autophagic degradation of wing disc in pea aphid
Source: eLife. 2023 Mar 21;12:e83023. doi: 10.7554/eLife.83023 (PMC10030113; doi:10.7554/eLife.83023)
Supplement: Figure 4—source data 8. [file elife-83023-fig4-data8.xlsx]

## Sheet: Sheet1
Figure 4 - Source Data 8
Figure 4H: 50% AA reduced the proportion of winged aphids
Treatment	Replicate	Winged%
100%AA	1	50
	2	30
	3	26.6667
	4	44.4444
	5	36.8421
	6	50
	7	76.1905
	8	75
50%AA	1	14.2857
	2	12.5
	3	17.6471
	4	33.3333
	5	14.2857
	6	5.55556
	7	5.26316
	8	21.0526
