# Supplementary material for: A novel gene REPTOR2 activates the autophagic degradation of wing disc in pea aphid
Source: eLife. 2023 Mar 21;12:e83023. doi: 10.7554/eLife.83023 (PMC10030113; doi:10.7554/eLife.83023)
Supplement: Figure 4—source data 9. [file elife-83023-fig4-data9.xlsx]

## Sheet: Sheet1
Figure 4 - Source Data 9
Figure 4I: Knockdown of both TOR and REPTOR2 attenuated autophagy in the wing disc 30 h post birth, relative to the control, dsTOR+dsGFP
Treatment	Replicate	ATG8/DAPI
dsTORdsGFP	1	1.12103
	2	0.94396
	3	0.946777
	4	1.06437
	5	0.977733
	6	0.936251
	7	1.00988
dsTORdsREPTOR2	1	0.342686
	2	0.466381
	3	0.341716
	4	0.467177
	5	0.274187
	6	0.434677
	7	0.572302
