# Supplementary material for: A novel gene REPTOR2 activates the autophagic degradation of wing disc in pea aphid
Source: eLife. 2023 Mar 21;12:e83023. doi: 10.7554/eLife.83023 (PMC10030113; doi:10.7554/eLife.83023)
Supplement: Figure 4—source data 10. [file elife-83023-fig4-data10.xlsx]

## Sheet: Sheet1
Figure 4 - Source Data 10
Figure 4J: Knockdown of both TOR and REPTOR2 increased the proportion of winged aphids
Treatment	Replicate	Winged%
dsTORdsGFP	1	55.5556
	2	28.5714
	3	31.5789
	4	41.1765
	5	33.3333
	6	36.8421
	7	16.6667
	8	20
dsTORdsREPTOR2	1	44.4444
	2	47.0588
	3	63.1579
	4	52.9412
	5	40
	6	56.25
	7	53.3333
	8	42.1053
