# Supplementary material for: A novel gene REPTOR2 activates the autophagic degradation of wing disc in pea aphid
Source: eLife. 2023 Mar 21;12:e83023. doi: 10.7554/eLife.83023 (PMC10030113; doi:10.7554/eLife.83023)
Supplement: Figure 4—source data 11. [file elife-83023-fig4-data11.xlsx]

## Sheet: Sheet1
Figure 4 - Source Data 11
Figure 4K: Knockdown of TOR increased REPTOR2 expression in the wing disc 24 h post birth, shown in mRNA-FISH
Treatment	Replicate	REPTOR2/DAPI
dsGFP	1	0.899544
	2	0.795816
	3	1.21631
	4	1.53073
	5	0.966852
	6	0.825187
	7	0.765554
dsTOR	1	2.46225
	2	2.16067
	3	2.42281
	4	1.63979
	5	1.89299
	6	1.77979
	7	1.40127
