# Supplementary material for: A novel gene REPTOR2 activates the autophagic degradation of wing disc in pea aphid
Source: eLife. 2023 Mar 21;12:e83023. doi: 10.7554/eLife.83023 (PMC10030113; doi:10.7554/eLife.83023)
Supplement: Figure 4—source data 12. [file elife-83023-fig4-data12.xlsx]

## Sheet: Sheet1
Figure 4 - Source Data 12
Figure 4L: Newborn nymphs fed with dsTOR-RNA increased REPTOR2 expression in whole body 24 h post birth, as determined by qPCR
Treatment	Replicate	REPTOR2
dsGFP	1	0.669525
	2	0.959131
	3	1.32125
	4	1.0501
dsTOR	1	1.94845
	2	2.39548
	3	1.32317
	4	1.31576
